1 **The genome of the camphor tree and the genetic and climatic relevance of the**  
2 **top-geoherbalism in this medicinal plant**

3  
4 Rihong Jiang<sup>1,3,†</sup>, Xinlian Chen<sup>2,4,†</sup>, Xuezhu Liao<sup>2</sup>, Dan Peng<sup>2</sup>, Xiaoxu Han<sup>2</sup>, Changsan  
5 Zhu<sup>1</sup>, Ping Wang<sup>3</sup>, David E. Hufnagel<sup>6</sup>, Cheng Li<sup>2,\*</sup>, Kaixiang Li<sup>1,\*</sup>, Li Wang<sup>2,5,\*</sup>

6  
7 <sup>1</sup>Guangxi Engineering and Technology Research Center for Woody Spices, Guangxi  
8 Key Laboratory for Cultivation and Utilization of Special Non-Timber Forest Crops,  
9 Guangxi Forestry Research Institute, Nanning, China

10 <sup>2</sup>Shenzhen Branch, Guangdong Laboratory for Lingnan Modern Agriculture, Genome  
11 Analysis Laboratory of the Ministry of Agriculture, Agricultural Genomics Institute at  
12 Shenzhen, Chinese Academy of Agricultural Sciences, Shenzhen, China

13 <sup>3</sup>College of Environmental Sciences and Engineering, Central South University of  
14 Forestry and Technology, Changsha, China

15 <sup>4</sup>School of Pharmaceutical Sciences, Sun Yat-Sen University, Guangzhou, China

16 <sup>5</sup>Kunpeng Institute of Modern Agriculture at Foshan, Foshan, China

17 <sup>6</sup>Virus and Prion Research Unit, National Animal Disease Center, USDA-ARS, Ames,  
18 USA

19 †These authors are contributed equally to this work.

20 \*Correspondence (email [wangli03@caas.cn](mailto:wangli03@caas.cn) (LW); email [lkx202@126.com](mailto:lkx202@126.com) (KXL);  
21 email [licheng@caas.cn](mailto:licheng@caas.cn) (CL))

22  
23 **Abstract**

24 Camphor tree (*Cinnamomum camphora* (L.) J. Presl), a species in the magnoliid  
25 family Lauraceae, is known for its rich volatile oils and is used as a medical  
26 cardiotoxic and as a scent in many perfumed hygiene products. Here, we present a  
27 high-quality chromosome-scale genome of *C. camphora* with a scaffold N50 of 64.34  
28 Mb and an assembled genome size of 755.41 Mb. Phylogenetic inference revealed  
29 that the magnoliids are a sister group to the clade of eudicots and monocots.  
30 Comparative genomic analyses identified two rounds of ancient whole-genome  
31 duplication (WGD). Tandem duplicated genes exhibited a higher evolutionary rate, a  
32 more recent evolutionary history and a more clustered distribution on chromosomes,  
33 contributing to the production of secondary metabolites, especially monoterpenes and  
34 sesquiterpenes, which are the principal essential oil components. Three-dimensional  
35 analyses of the volatile metabolites, gene expression and climate data of samples  
36 with the same genotype grown in different locations showed that low temperature and  
37 low precipitation during the cold season modulate the expression of genes in the  
38 terpenoid biosynthesis pathways, especially *TPS* genes, which facilitates the  
39 accumulation of volatile compounds. Our study lays a theoretical foundation for  
40 policy-making regarding the agroforestry applications of camphor tree.

41  
42 **Keywords:** *Cinnamomum camphora*, genome, top-geoherbalism, tandem duplication,  
43 climatic factors

44

## 45 Introduction

46 Top-geoherbalism, also known as “Daodi” in China and “Provenance” or “Terroir” in  
47 Europe, refers to traditional herbs grown in certain native ranges with better quality  
48 and efficacy than those grown elsewhere, in which the relevant characteristics are  
49 selected and shaped by thousands of years of the clinical application of traditional  
50 medicine (Brinckmann, 2015). The concept of top-geoherbalism is documented in the  
51 most ancient and classic Chinese Materia Medica (Divine Husbandman’s Classic of  
52 Materia Medica; *Shen Nong Ben Cao Jing*) from approximately 221 B.C. to 220 A.D.  
53 (Zhao et al., 2012), which reported that the origin and growing conditions of most  
54 herbs were linked to their quality. Historical literature documented cases where the  
55 misuse of traditional Chinese medicine (TCM) in prescriptions led to a reduction or  
56 absence of therapeutic effects. For example, the application of dried tender shoots of  
57 *Cinnamomum cassia* Presl (a component of *Guizhi soup* recorded in *Prescriptions for*  
58 *Emergencies*) from non-top-geoherb regions led to a deficiency in the treatment of  
59 fever, while the replacement of this TCM with materials from top-geoherb regions  
60 results in proper fever treatment. Currently, TCM from top-geoherb regions accounts  
61 for 80% of the market occupancy and economic profits of all TCMs (Huang, 2012),  
62 and the significance of top-geoherbs has been revived by the increasing trend of the  
63 protection of botanicals with “geographical indication” (GI) (Brinckmann, 2015). Thus,  
64 a deep understanding of the pattern and mechanism of top-geoherbalism will strongly  
65 guide producers and consumers of TCM and improve the standardization and  
66 internalization of the TCM market, especially in the economic context of the Belt and  
67 Road Initiative (Hinsley et al., 2020).

68 A substantial basis of the top-geoherbalism of TCMs is secondary metabolites that  
69 play principal roles in the therapeutic effects of herbs. The content of secondary  
70 metabolites is a continuous quantitative trait that is determined by three factors:  
71 genotype, environment and the interaction between the genotype and environment. Li  
72 et al. (2020) showed that cultivars of opium poppy with similar copy number variations  
73 in benzyloisoquinoline alkaloid biosynthetic genes were likely to exhibit similar alkaloid  
74 contents. To identify the ecological and climatic factors driving the development  
75 top-geoherbs, the appropriate strategy is to grow herbs with the same genotype  
76 (eliminating the effect of genetic variation) in different environmental settings and  
77 study how environmental factors are correlated with secondary metabolites by altering  
78 gene expression. However, most published studies confound the effects of genetic  
79 variation and environmental factors. For example, Tan et al. (2015) identified  
80 metabolite markers for distinguishing *Radix Angelica sinensis* from top-geoherb  
81 regions and non-top-geoherb regions by analysing the volatile metabolites of  
82 processed herbal medicine from drug stores in different regions. The roots of *Paeonia*  
83 *veitchii* showed higher bioactivities when grown at lower average annual  
84 temperatures and high elevations based on the analyses of environmental factors and  
85 phytochemicals of different samples from seven populations (Yuan et al., 2020). Liu et  
86 al. (2020) revealed a correlation between iridoid accumulation and increased  
87 temperature by examining 441 individuals from 45 different origins. The confounding

88 factor of genetic variation led to the misinterpretation of how environmental factors  
89 alone affect secondary metabolites. In addition, top-geoherb TCMs have been  
90 annotated with their cultural properties, including their cultivation, harvesting and  
91 postharvest processing (Huang, 2012), which is outside of the scope of the current  
92 study.

93 *Cinnamomum camphora* (L.) J. Presl (Figure 1a), also known as camphor tree is  
94 native to China, India, Mongolia and Japan (Chen et al., 2017; Yoshida et al., 1969)  
95 and was later introduced to Europe and the southern United States (Bottoni et al.,  
96 2021; Hamidpour et al., 2012; Ravindran et al., 2004). Camphor trees are divided into  
97 five chemotypes according to their dominant volatile oil components as linalool,  
98 camphor, eucalyptol, borneol and isonerolidol types (Luo et al., 2021). Their leaves  
99 are especially rich in volatile oil components, including monoterpenes, sesquiterpenes  
100 and diterpenes (Hou et al., 2020; Tian et al., 2021). Camphor tree has high medicinal,  
101 ornamental, ecological and economic value (Chen, 2020; Liu et al., 2019; Zhang et al.,  
102 2020). As a TCM, *C. camphora* can be used to treat rheumatism and arthralgia, sores  
103 and swelling, skin itching, poisonous insect bites, etc. Among the many chemical  
104 components of the species, camphor is used as a cardiogenic, deodorant and  
105 stabilizer in medicine, daily-use chemical production and industry, and linalool is most  
106 frequently used as a scent in 60% to 80% of perfumed hygiene products and cleaning  
107 agents (Consultation, 2021; Eggersdorfer, 2000; Letizia et al., 2003).

108 *C. camphora* belongs to Lauraceae within the magnoliid group comprising four  
109 orders (Laurales, Magnoliales, Canellales and Piperales). Magnoliids are the third  
110 largest group of angiosperms, including approximately 9,000-10,000 species  
111 (Massoni et al., 2015; Palmer et al., 2004). From an evolutionary point of view, the  
112 mysterious phylogenetic position of magnoliids within angiosperms has been debated  
113 for decades. Recently, the debate on the phylogenetic position of magnoliids has  
114 focused on three main topologies (Endress and Doyle, 2009; Moore et al., 2007; Qiu  
115 et al., 2010; Zeng et al., 2014) positioning magnoliids as (a) a sister group to eudicots  
116 (Chaw et al., 2019; Lv et al., 2020; Shang et al., 2020); (b) a sister group to monocots  
117 (Qin et al., 2021); or (c) a sister group to the clade of monocots and eudicots (Chen et  
118 al., 2019; Chen et al., 2020; Chen et al., 2020; Hu et al., 2019; Rendón-Anaya et al.,  
119 2019). Furthermore, the different whole-genome duplication (WGD) events that have  
120 occurred in specific lineages of magnoliids and the divergences time between  
121 different magnoliid plants remain unclear (Chaw et al., 2019; Chen et al., 2019; Chen  
122 et al., 2020; Chen et al., 2020; Hu et al., 2019; Lv et al., 2020; Qin et al., 2021;  
123 Rendón-Anaya et al., 2019; Shang et al., 2020).

124 Despite the economic and evolutionary value of *C. camphora*, the lack of a  
125 high-quality genome for the species has greatly restricted the progress of genetic  
126 research and the identification of the biosynthetic genes underlying the production of  
127 essential volatile compounds with medicinal effects (Chaw et al., 2019; Chen et al.,  
128 2019; Chen et al., 2020; Chen et al., 2020; Hu et al., 2019; Lv et al., 2020;  
129 Rendón-Anaya et al., 2019; Shang et al., 2020). In our study, we *de novo* assembled  
130 the chromosome-scale genome of *C. camphora*, explored the genomic characteristics  
131 of *C. camphora* and investigated the genetic and climatic factors underlying the

132 top-geothermalism of this well-known TCM.

133

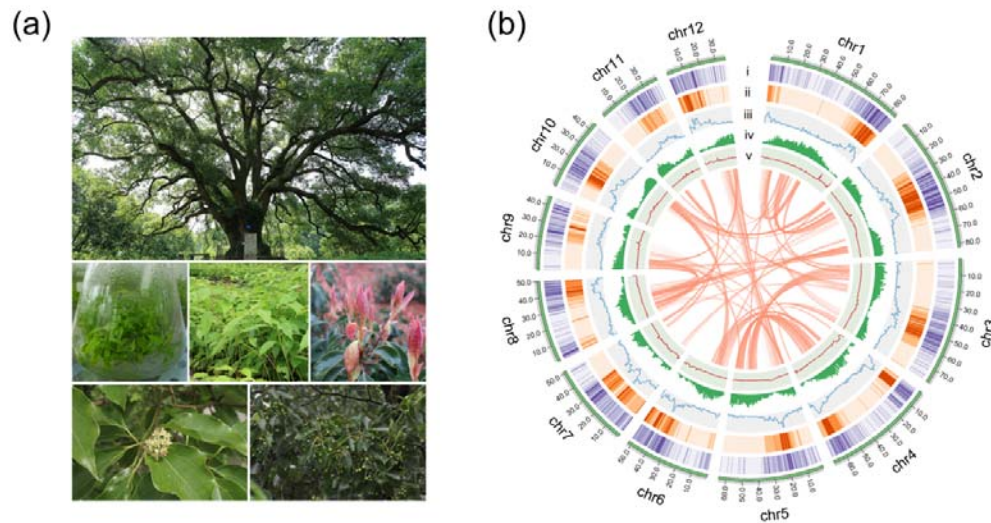

134

135 **Figure 1** The camphor tree and landscape of its genome. (a) Images of a camphor tree and its multiple  
136 tissues. (i) An ancient camphor tree, (ii) tissue-cultured seedlings, (iii) seedlings, (iv) young leaves, (v)  
137 flowers and (vi) fruits. (b) Circos plot of the *C. camphora* genome assembly. Circles from outside to inside:  
138 (i) chromosomes, (ii) *Gypsy* LTR density, (iii) *Copia* LTR density, (iii) total LTR density, (iv) gene density  
139 and (v) GC content. These density metrics were calculated with 1 Mb nonoverlapped sliding windows.

140

The syntenic genomic blocks (>300 kb) are illustrated with orange lines.

141

## 142 Results

### 143 *C. camphora* genome assembly and annotation

144 A haplotype-resolved genome assembly was obtained by using Hifiasm (Cheng et al.,  
145 2021) integrating HiFi long reads (24.95 Gb; ~32.83X based on a previous flow  
146 cytometry-based estimated genome size of 760 Mb (Wu, 2014)) and Hi-C short reads  
147 (63.78 Gb; ~83.92X) with the default parameters. The two contig-level haplotype  
148 genomes showed total sizes of 768.97 Mb and 752.05 Mb, respectively, after  
149 removing redundant sequences with Purge\_haplotigs (Roach et al., 2018). Compared  
150 with the earlier published *C. kanehirae* genome (Chaw et al., 2019), the contig N50  
151 was 2.01 Mb for haplotype A and 2.25 Mb for haplotype B; these values are ~2.2- and  
152 ~2.5-fold higher, respectively, than the values of the previously published *C.*  
153 *kanehirae* genome (Chaw et al., 2019), respectively (Table 1). Benchmarking  
154 Universal Single-Copy Orthologue (BUSCO) analyses showed that the contig sets of  
155 haplotype A and haplotype B contained 94.1% and 96.0% complete sets of the core  
156 orthologous genes of viridiplantae, respectively (Table S2). Subsequently, the two  
157 nonredundant contig sets were anchored to 12 chromosomes based on Hi-C contacts  
158 (Figure S1). Overall, the assembled genome size was consistent with previous  
159 reports (Table 1; Table S3). As the chromosome-level haplotype A genome was much  
160 closer to the estimated genome size than the haplotype B genome, it was used for  
161 subsequent analyses.

162 The final assembled *C. camphora* genome consisted of 12 chromosomes, 1,025  
163 scaffolds and 1,686 contigs, with a scaffold N50 of 64.34 Mb (Table 1; Figure 1b). The  
164 number of assembled chromosomes was consistent with previous cytological  
165 observations (<http://ccdb.tau.ac.il>). The length of the chromosomes ranged from  
166 84.54 Mb (Chr1) to 36.36 Mb (Chr12) (Table S5). The high fidelity of the assembly  
167 was corroborated by multiple lines of evidence. First, the mapping rates of RNA-Seq  
168 paired-end reads against the assembled genome were high (93%-95%). Second, the  
169 high completeness of this assembly was supported by a 96.2% BUSCO value (Table  
170 1; Table S4), suggesting high completeness at the gene level, which was much better  
171 than the completeness of the *C. kanehirae* genome assembled via PacBio CLR  
172 sequencing. Third, the long terminal repeat (LTR) assembly index (LAI) score (Ou et  
173 al., 2018) was 13.82, indicating the “reference” level of the genome and reflecting  
174 completeness at the transposable element (TE) level.

175 By combining *ab initio* prediction, orthologous protein and transcriptomic data, we  
176 annotated 24,883 protein-coding genes using the MAKER pipeline (Cantarel et al.,  
177 2008) (Table 1). The average lengths of the gene regions, coding sequences (CDSs),  
178 exon sequences, and intron sequences were 9,295.00, 1,189.59, 309.29, and  
179 1,548.48 bp, respectively (Table 1). Among the predicted protein-coding genes,  
180 97.06% could be annotated in at least one of the following protein-related databases:  
181 NCBI nonredundant protein (NR) (97.04%), Swiss-Prot (80.87%), Pfam (72.12%), GO  
182 (46.59%) or KEGG (45.08%) (Table 1).

183 A total of 361.37 Mb of TEs were identified (Table S6). Long-terminal repeat  
184 retrotransposons (LTR-RTs) were the most abundant type of repetitive sequence,  
185 accounting for 46.86% of the whole genome, similar to the proportion of LTRs found in  
186 *C. kanehirae* (Table 1). A total of 3,731 intact LTR-RTs were identified, and the  
187 frequency distribution of insertion times showed a burst of LTR-RTs 1-2 million years  
188 ago (Mya) (Figure S2), consistent with previous reports in magnoliids. Gypsy  
189 elements were the largest LTR-RT superfamily in *C. camphora*, constituting 15.42% of  
190 the genome. The second largest superfamily was Copia, accounting for 7.69% of the  
191 genome. Other unclassified LTR-RTs encompassed 4.83% of the genome. Among  
192 DNA retrotransposons, terminal inverted repeat sequences (TIRs) and non-TIRs  
193 comprised 14.05% and 5.87% of the genome, respectively.

194



**Table 1 The statistics for genome assemblies of *Cinnamomum***

|                                          | <i>C. camphora</i> | <i>C. kanehirae</i> |
|------------------------------------------|--------------------|---------------------|
| <b>Gene assembly</b>                     |                    |                     |
| Genome size (Mb)                         | 755.41             | 730.43              |
| Scaffold number (n)                      | 1,037              | 2,153               |
| Scaffold N50 (Mb)                        | 64.34              | 50.35               |
| Scaffold L51 (n)                         | 5                  | 6                   |
| Chromosome-scale scaffolds (Mb)          | 697.81 (92.38%)    | 672.85 (92.12%)     |
| Contig number (n)                        | 1,686              | -                   |
| Contig N50 (Mb)                          | 2.01               | 0.90                |
| Contig L51 (n)                           | 108                | -                   |
| GC content of the genome (%)             | 39.49              | 38.22               |
| Complete BUSCOs (%)                      | 96.20              | 88.50               |
| <b>TE annotation</b>                     |                    |                     |
| TE content (%)                           | 47.86              | 47.87               |
| LTR content (%)                          | 27.94              | 25.53               |
| Copia content (%)                        | 7.69               | -                   |
| Gypsy content (%)                        | 15.42              | -                   |
| LAI                                      | 13.82              | -                   |
| <b>Gene annotation</b>                   |                    |                     |
| Number of predicted genes (n)            | 24,883             | 27,899              |
| Average gene length (bp)                 | 9,295.00           | 7,591.84            |
| Average CDS length (bp)                  | 1,189.59           | 1,310.51            |
| Average exon length (bp)                 | 309.29             | 241.55              |
| Average exon number per transcript (n)   | 4.80               | 5.40                |
| Average intron length (Mb)               | 1,548.48           | 1,425.80            |
| Average intron number per transcript (n) | 4.40               | 4.06                |
| <b>Gene function annotation</b>          |                    |                     |
| Nr                                       | 24,147 (97.04%)    | -                   |
| Swissprot                                | 20,122 (80.87%)    | -                   |
| Pfam                                     | 17,945 (72.12%)    | -                   |
| GO                                       | 11,593 (46.59%)    | -                   |
| KEGG                                     | 11,218 (45.08%)    | -                   |
| Total                                    | 24,152 (97.06%)    | -                   |

The assembly for *C. camphora* was compared with *C. kanehirae*. Dash (-) indicates data were not shown in the original research.

195

196

### 197 **Phylogenetic and WGD analyses**

198 The concatenate phylogenetic tree constructed with 172 single-copy orthologous  
 199 genes among 16 species showed that *C. camphora* was clustered with two other  
 200 Lauraceae species and that the formed clade was then clustered with other  
 201 magnoliids (Figure 2; Figure S3a). More importantly, the magnoliids were sister to the  
 202 combined clade of eudicots and monocots rather than to either monocots or eudicots.  
 203 In addition, the coalescence-based phylogenetic tree showed the same topology for

204 magnoliids as the concatenation tree (Figure S3b). This phylogenetic topology is  
 205 consistent with some previous studies (Chen et al., 2019; Chen et al., 2020; Chen et  
 206 al., 2020; Hu et al., 2019; Rendón-Anaya et al., 2019) but contrasts with other reports  
 207 (Chaw et al., 2019; Lv et al., 2020; Qin et al., 2021; Shang et al., 2020). The  
 208 divergence time between magnoliids and the clade of monocots and eudicots was  
 209 inferred to be 147.47-170.11 Mya (Figure 2) in MCMCTree with fossil calibration  
 210 (Yang et al., 2007), coinciding with the estimates in other studies (Chen et al., 2019;  
 211 Chen et al., 2020; Chen et al., 2020; Hu et al., 2019; Rendón-Anaya et al., 2019). In  
 212 the clade of magnoliids, the divergence time between Laurales and Magnoliales was  
 213 approximately 138.96 Mya, after which the divergence of Lauraceae and  
 214 Calycanthaceae occurred approximately 114.26 Mya, and finally, *C. camphora*  
 215 diverged from the most recent common ancestor of *C. camphora* and *C. kanehirae*  
 216 approximately 28.03 Mya.  
 217

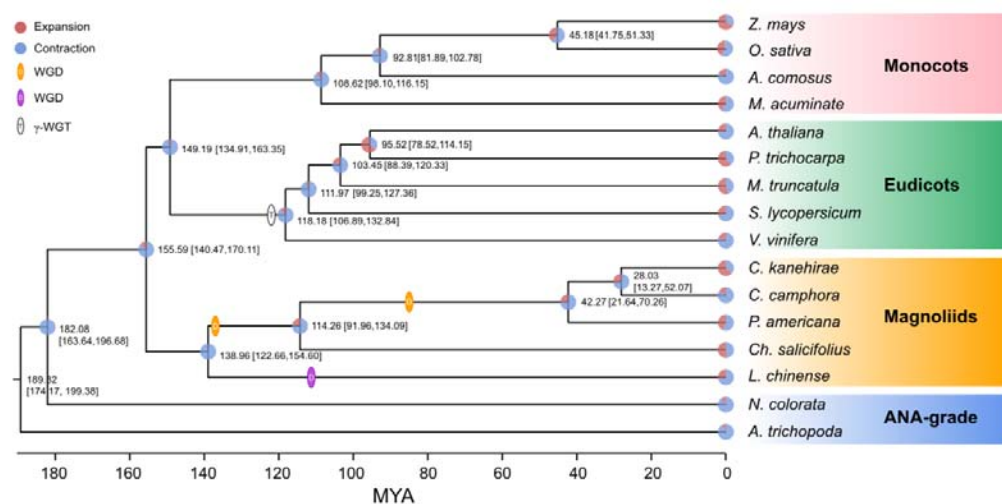

218  
 219 **Figure 2** Phylogenetic analyses. The phylogenetic tree was constructed based on 172 single-copy  
 220 orthologous genes of 16 species using two ANA-grade species as outgroups; node age and 95%  
 221 confidence intervals are labeled. Pie charts show the proportions of gene families that underwent  
 222 expansion or contraction. Predicted whole-genome duplication (WGD) events were only indicated for  
 223 Laurales and Magnoliales.  
 224

225 The intragenomic collinearity and syntenic depth ratio of *C. camphora* showed clear  
 226 syntenic evidence of ancient WGD events (Figure 1b; Figure S4). Only the paralogous  
 227 gene set derived from duplicates produced by WGD was used for the analyses of  
 228 synonymous substitutions per site (*K<sub>s</sub>*) (see “Methods” section). Two ancient WGD  
 229 events shared within the Laurales lineage (*C. camphora*, *C. kanehirae* and *Persea*  
 230 *americana*) occurred approximately 85.66 Mya and 137.90 Mya, represented by two  
 231 signature peaks with *K<sub>s</sub>* values of approximately 0.52 and 0.83 (Figure 3a). The  
 232 recent *K<sub>s</sub>* peak (85.66 Mya) occurred much earlier than the divergence time (42.27  
 233 Mya) between *P. americana* and the common ancestor of *Cinnamomum*, indicating  
 234 that this round of WGD was shared between *Cinnamomum* and *Persea* (Figure 2;

235 Figure 3a). Additionally, the *Ks* peak (137.90 Mya) occurred earlier than the  
236 divergence (114.26 Mya) between Lauraceae species and *Chimonanthus salicifolius*,  
237 implying that this round of WGD was shared between Lauraceae and Calycanthaceae  
238 (Figure 2; Figure 3a). We also detected a WGD event in *Liriodendron chinense* that  
239 occurred approximately 116.67 Mya, corresponding to a *Ks* peak of 0.70 (Figure 3a),  
240 which is consistent with a previous study (Chen et al., 2019).

241 To confirm that *C. camphora* underwent two rounds of ancient WGD, we performed  
242 intergenomic synteny analyses between the genomes of *C. camphora* and *L.*  
243 *chinense* together with *Vitis vinifera*. A “4:2” syntenic relationship was detected  
244 between *C. camphora* and *L. chinense* (Figure S5a). Given the hexaploidy event  
245 ( $\gamma$ -WGT) shared among core eudicots, including *V. vinifera* (French-Italian Public  
246 Consortium for Grapevine Genome Characterization, 2007), an overall “4:3” syntenic  
247 relationship was observed between *C. camphora* and *V. vinifera* (Figure S5b).  
248 Furthermore, we discovered a “2:3” syntenic relationship between *L. chinense* and *V.*  
249 *vinifera* (Figure S5c). Thus, the syntenic relationships among the *L. chinense*:*V.*  
250 *vinifera*:*C. camphora* genomes showed a 2:3:4 ratio (Figure 3b). Our results echoed  
251 previous studies (Chaw et al., 2019; Chen et al., 2019), indicating two rounds of  
252 ancient WGD in Lauraceae.

253 To determine the functional roles of the genes retained after WGD events, GO and  
254 KEGG enrichment analyses were performed. The results showed that the genes  
255 retained after WGD were enriched in basic physiological activities, processes and  
256 pathways, such as structural constituents of ribosomes, NADPH dehydrogenase  
257 activity, photosynthesis and plant hormone signal transduction, suggesting that two  
258 rounds of WGD events enhanced the adaptability of *C. camphora* to changing  
259 environments by improving basic physiological activities and primary metabolism  
260 (Figure S6; Figure S7; Table S7; Table S12).

261



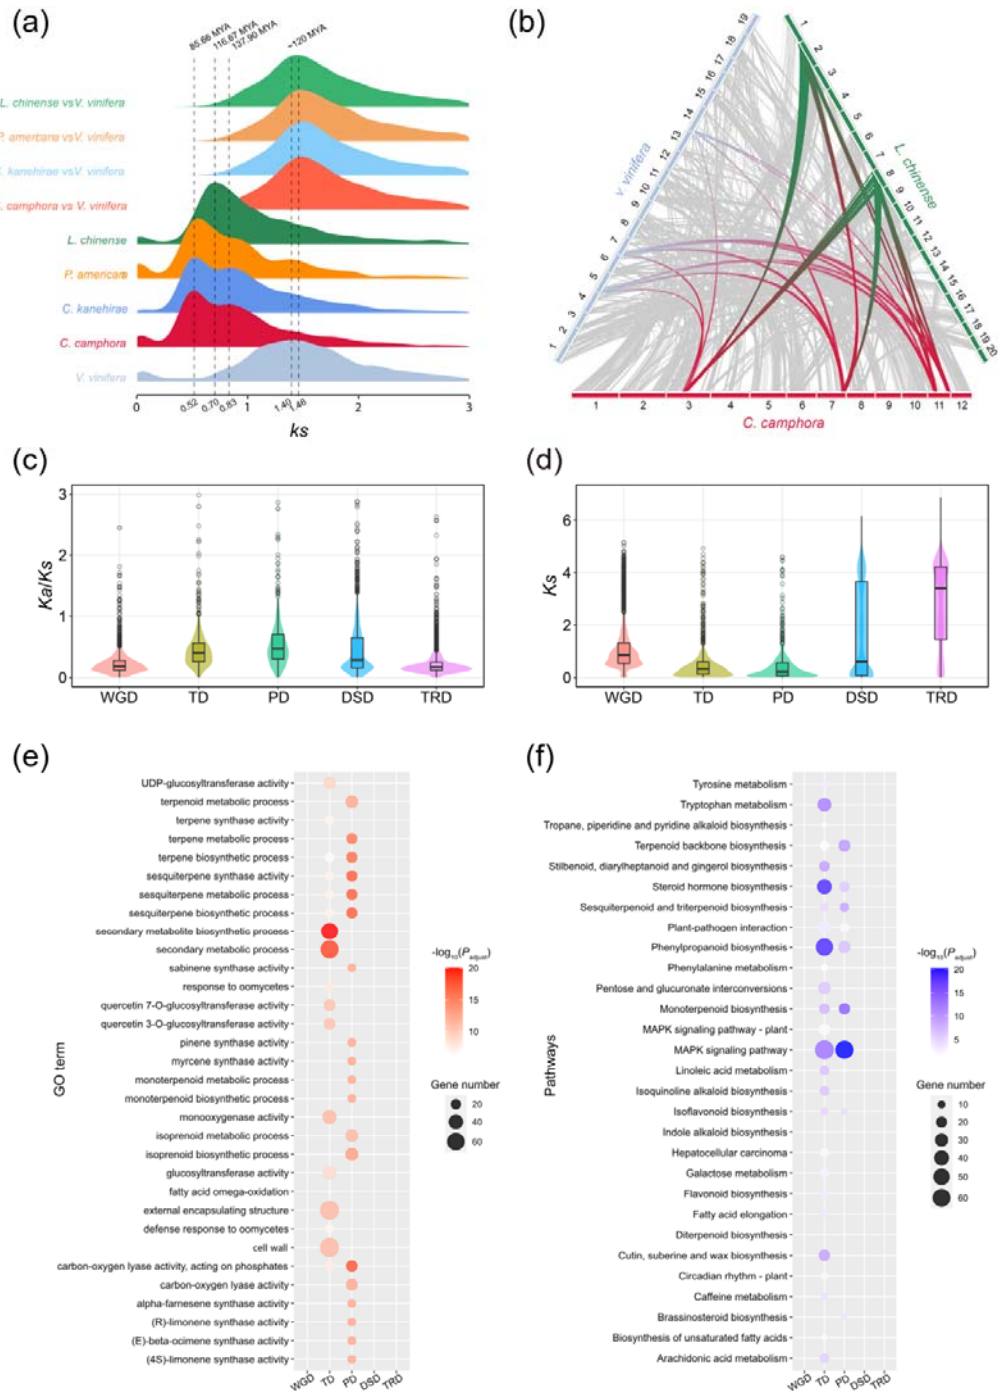

262

263

264

265

266

267

268

269

**Figure 3** Gene duplication and evolution. (a) Ks distribution of paralogues in magnoliid species (*C. camphora*, *C. kanehirae*, *P. americana* and *L. chinense*) and orthologues between these magnoliids and *V. vinifera*. (b) Synteny blocks among *C. camphora*, *L. chinense* and *V. vinifera*. (c) Ka/Ks ratio distributions of gene pairs derived from different types of duplication. WGD, whole-genome duplication; TD, tandem duplication; PD, proximal duplication; TRD, transposed duplication; DSD, dispersed duplication. (d) Ks ratio distributions of gene pairs derived from different types of duplication. (e) GO enrichment analyses of genes from different types of duplication. The enriched GO terms with adjusted  $P$

270 values < 0.01 are presented. The colours of the bubbles indicate the statistical significance of the  
271 enriched GO terms. The sizes of the bubbles indicate the number of genes associated with one GO term.  
272 (f) KEGG enrichment analyses of genes resulting from different types of duplication. Enriched KEGG  
273 pathways with adjusted *P* values < 0.01 are presented. The colours of the bubbles represent the  
274 statistical significance of enriched KEGG pathways. The sizes of the bubbles indicate the number of  
275 genes associated with one KEGG pathway.

276

### 277 **Tandem and proximal duplications contribute to terpene synthesis in *C.*** 278 ***camphora***

279 A total of 18,938 duplicated genes were identified, including 7,043 WGD genes  
280 (37.19%), 1,597 tandem duplication (TD) genes (8.43%), 1,079 proximal duplication  
281 (PD) genes (5.70%), 5,127 dispersed duplication (DSD) genes (27.07%) and 3,779  
282 transposed duplication (TRD) genes (19.95%) (Figure S8). The *K<sub>s</sub>* and *K<sub>a</sub>/K<sub>s</sub>* values  
283 among different types of duplicated genes were calculated (Figure 3c; Figure 3d). The  
284 *K<sub>s</sub>* values of TD and PD genes were much smaller than those of other types of  
285 duplications (Figure 3d), suggesting that TD and PD genes were formed recently.  
286 Additionally, the higher *K<sub>a</sub>/K<sub>s</sub>* ratios of TD and PD genes (Figure 3c) implies that they  
287 were subject to more rapid sequence divergence.

288 We also performed GO and KEGG enrichment analyses of the gene sets  
289 associated with the five duplication types (Figure S6; Figure S7; Table S7-S16). The  
290 GO results showed that the biological process (BP) and molecular function (MF)  
291 categories of secondary metabolite, monoterpene, sesquiterpene and terpene  
292 biosynthesis and metabolism were significantly enriched in the TD and PD gene sets,  
293 but no enrichment of these GO terms was found in the WGD, DSD and TRD gene  
294 sets (Figure 3e). Regarding the KEGG results, the TD and PD gene sets were  
295 significantly enriched in the terpenoid backbone, monoterpenoid, sesquiterpenoid and  
296 phenylpropanoid biosynthesis pathways. These secondary metabolite biosynthesis  
297 pathways were not enriched in the other three duplication gene sets (Figure 3f). In  
298 addition, KEGG pathways related to responses to environmental stimuli, such as the  
299 MAPK signalling pathway, steroid hormone biosynthesis and plant-pathogen  
300 interaction, were also significantly enriched in the TD and PD gene sets. All of these  
301 results indicated that the rapidly evolving TD and PD genes played essential roles in  
302 the synthesis of secondary metabolites, especially monoterpenes and sesquiterpenes,  
303 and the response to environmental stimuli in *C. camphora*.

304

### 305 **Metabolic reflection of top-geoherbalism**

306 To evaluate how environmental factors affect metabolite accumulation, we grew  
307 tissue-cultured seedlings from a single mother plant in four major production locations,  
308 including Qinzhou, Nanning, Baise and Liuzhou, beginning in May 2018. Mature  
309 leaves were harvested from the four locations in November 2020 for RNA-Seq and  
310 metabolite assessment. Thus, we were able to compare the effects of environmental  
311 conditions on metabolite accumulation based on the fixed genotype.

312 Volatile metabolites are a substantial basis of the top-geoherbalism of camphor tree.  
313 Based on targeted gas chromatography-mass spectrometry (GC-MS) analyses, we

314 identified 153 nonredundant volatile metabolites (Supplemental Table 17). The 153  
315 volatile metabolites included 82 terpenes (53.60%), 14 esters (9.15%), 13 ketones  
316 (8.50%), 12 heterocyclic compounds (7.84%), 10 alcohols (6.54%), 9 aromatics  
317 (5.88%) and 13 additional metabolites (8.49%) that did not belong to these six main  
318 types (Figure 4a). For quality control, we performed hierarchical clustering and  
319 principal component analyses (PCA) of metabolic abundances in these 24 samples  
320 (Figure S9). The first replicate in Baise (“Baise\_1”) was identified as an outlier and  
321 was removed from further analyses.

322 The volatile metabolites of the samples from the four locations exhibited distinct  
323 clustering in the PCA plot (Figure 4c). Notably, the metabolites of samples from Baise  
324 and Liuzhou were clearly separated from those of Qinzhou and Nanning according to  
325 principal component 1 (PC1), which accounted for 43.2% of the total variance. The  
326 heatmap based on the relative abundances of volatile metabolites showed that  
327 samples from Baise and Liuzhou exhibited higher abundances than those from  
328 Qinzhou and Nanning, especially with regard to terpenes (Figure 4b; Figure S10).

329 Linalool, borneol, camphor, 1,8-cineole and isonerolidol are the five main  
330 phytochemicals determining the medicinal value and top-geoherbalism of *C.*  
331 *camphora*. A detailed comparison of the five volatile terpenoids implied that samples  
332 from Liuzhou showed the highest total abundance, followed by the samples from  
333 Baise, while the abundance was lowest in Qinzhou (Figure 4d). The abundance  
334 profiling of camphor and borneol in the four locations echoed the trends of the total  
335 abundance of the five volatile terpenoids. The abundance of linalool and isonerolidol  
336 peaked in Baise and Liuzhou, respectively, while that of 1,8-cineole peaked in  
337 Nanning. Taken together, these results suggested that Baise and Liuzhou are  
338 top-geoherb regions of the camphor tree in Guangxi Province.

339

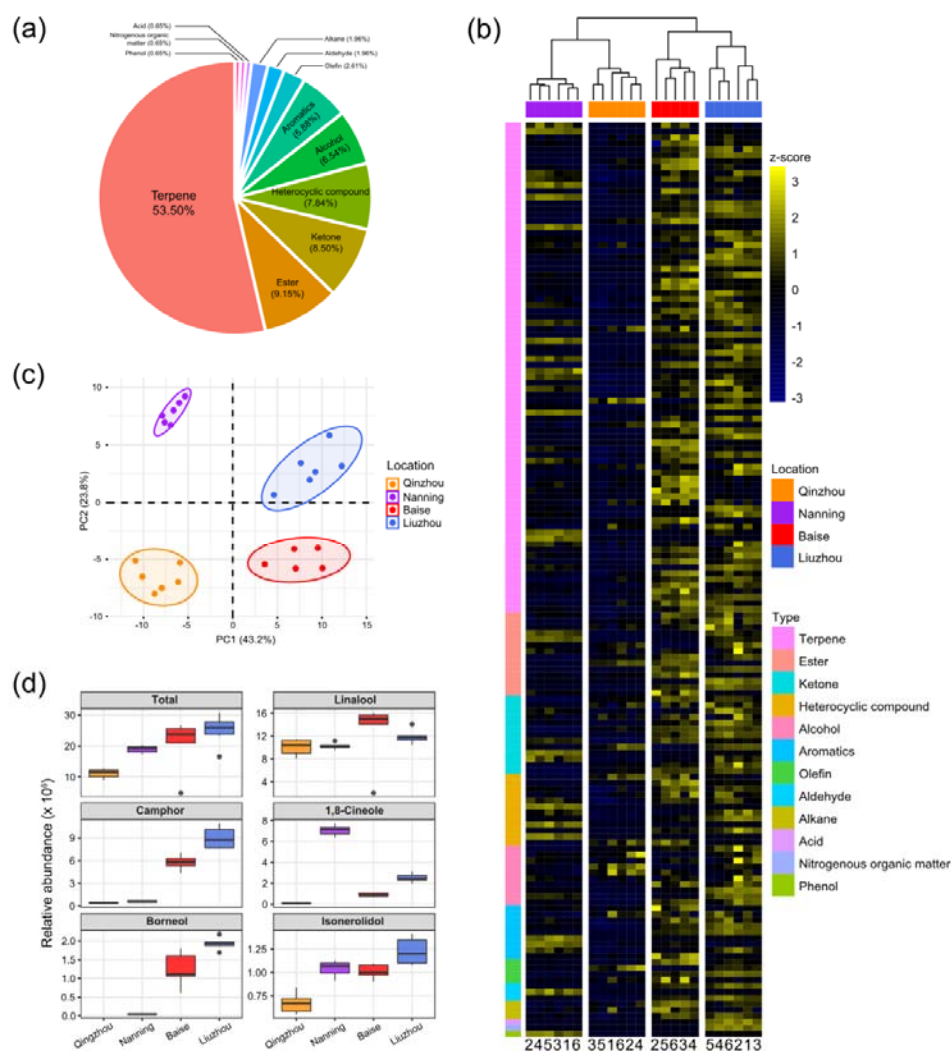

340  
 341 **Figure 4** Abundance patterns of volatile metabolites in *C. camphora* planted in different locations. (a) Pie  
 342 charts show the proportions of different types of metabolites identified in the current study. (b)  
 343 Hierarchical clustering heatmap of metabolic abundance profiles in the four planting locations, including  
 344 Qinzhou, Nanning, Baise and Liuzhou, indicated on the x axis. Metabolic abundance was averaged and  
 345 z-score transformed. The rows are clustered by the types of metabolites. (c) Principal component  
 346 analyses (PCA) of metabolites of *C. camphora* planted in the four locations. The circles represent the  
 347 95% confidence intervals. (d) The relative abundances of linalool, borneol, camphor, 1,8-cineole and  
 348 isonerolidol in the four planting locations.

349

### 350 Modulation of gene expression related to top-geoherbalism

351 TPSs are the rate-limiting enzymes in the production of terpenoids (Chen et al., 2011;  
 352 Tholl, 2015), including monoterpenes, sesquiterpenes and diterpenoids (see  
 353 “Methods” section). The identified *TPS* genes of *C. camphora*, *C. kanehirae*, *P.*  
 354 *americana*, *L. chinense* and *Arabidopsis thaliana* were clustered into six clades in the  
 355 phylogenetic tree, corresponding to the *TPS-a*, *TPS-b*, *TPS-c*, *TPS-e*, *TPS-f* and  
 356 *TPS-g* subfamilies (Chen et al., 2011), among which *TPS-b* and *TPS-g* encode the

357 enzymes catalysing the production of 10-carbon monoterpenoids from geranyl  
358 diphosphate (GPP), and *TPS-a* genes are responsible for catalysing the production of  
359 15-carbon sesquiterpenoids from farnesyl diphosphate (FPP) (Figure 5a,b). The copy  
360 number variation of the *TPS* genes showed that *TPS-b* was greatly expanded in *C.*  
361 *kanehirae* and *C. camphora* (Figure 5a,b), which resulted in the high abundance of  
362 monoterpenoids in *Cinnamomum* (Chen et al., 2020; Chen et al., 2020). Specifically,  
363 44 *TPS-b* genes were identified in *C. camphora*, accounting for 61% of all its *TPS*  
364 genes, consistent with the percentage observed in *C. kanehirae* (63%) and much  
365 higher than those in *L. chinense* (33%), *A. thaliana* (18%) and *P. americana* (12%).  
366 We also observed more copies of the *TPS-g* subfamily in *C. camphora* than in *A.*  
367 *thaliana* and *P. americana*. However, no expansion of *TPS-a* genes was detected in  
368 *Cinnamomum*.

369 Next, we examined how the *TPS* genes were distributed across the genome.  
370 Chromosome 9 and chromosome 7 harboured the most *TPS* genes (27 and 25,  
371 respectively), followed by chromosome 3 (13 *TPS* genes) (Figure 5c; Table S18).  
372 Interestingly, genes from the seven subfamilies were observed as tandem duplicates.  
373 Two large *TPS-b* gene clusters were identified on chromosome 9 (21 genes; ca.  
374 38.78-40.12 Mb) and chromosome 7 (10 genes; ca. 12.70-16.03 Mb), respectively. In  
375 addition, two large *TPS-a* gene clusters were detected on chromosome 3 (10 genes;  
376 ca. 31.90-32.52 Mb) and chromosome 7 (6 genes; ca. 19.49-19.90 Mb), respectively.  
377 The remaining smaller *TPS* gene clusters were scattered throughout the genome of *C.*  
378 *camphora*.

379 Notably, the *TPS* genes exhibited a strong tissue-specific expression pattern  
380 (Figure 5d; Table S19), especially *TPS-a*, *TPS-b* and *TPS-g*. We downloaded  
381 previously published RNA-Seq data  
382 (<https://www.ncbi.nlm.nih.gov/bioproject/PRJNA747104>) from three tissues (leaf,  
383 stem and root) of *C. camphora* to determine the gene expression profile of *TPS* genes.  
384 As leaves are the major tissue used in medicine, we focused on the *TPS* genes with  
385 high expression levels in leaves. Six *TPS-a* genes and twelve *TPS-b* genes showed  
386 higher expression in leaves than in stems and roots. All of these results indicated that  
387 the expansion of the *TPS-b* subfamily and the tandem duplication of *TPS-b* genes  
388 probably contribute to monoterpenoid biosynthesis in *C. camphora*.

389



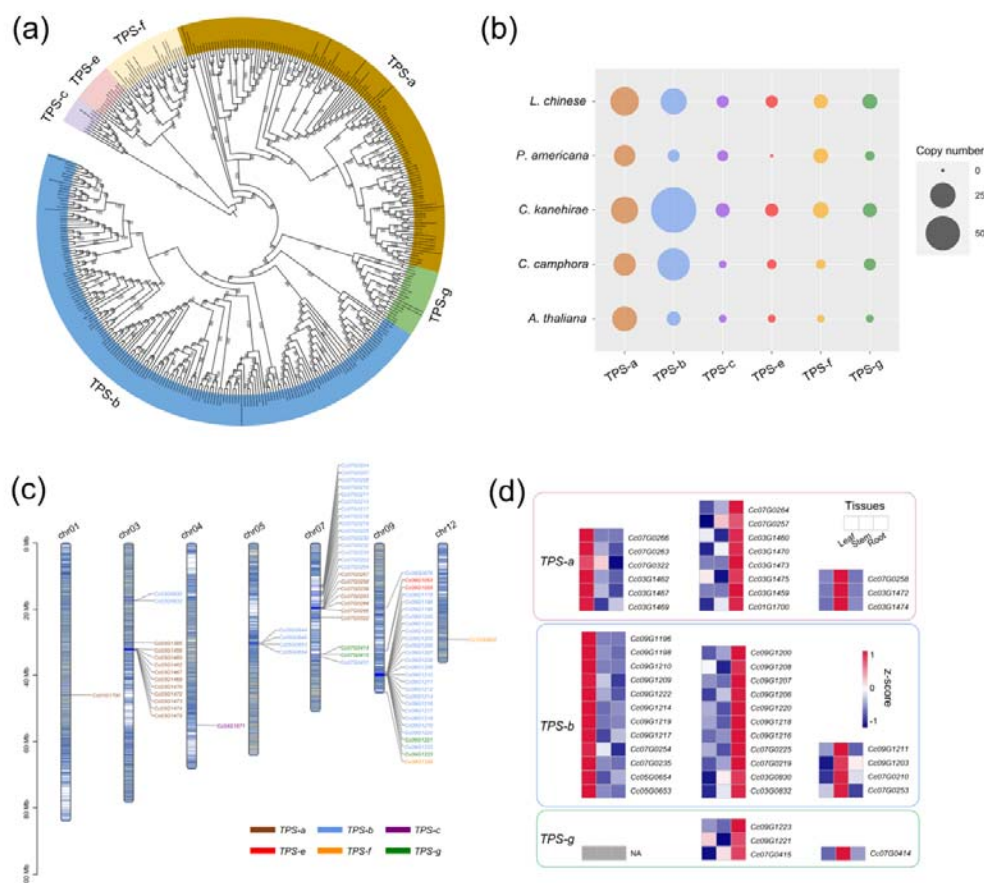

390

391

**Figure 5** Genes involved in the biosynthesis of volatile terpenoids. (a) Phylogenetic analyses of *TPS*

genes in *C. camphora*. The phylogenetic tree was constructed based on *TPS* gene sequences from four

magnoliid genomes (*C. camphora*, *C. kanehirae*, *P. americana* and *L. chinense*) and *A. thaliana*. (b)

Copy numbers of *TPS* genes in the genomes of four magnoliids and *A. thaliana*. (c) Distribution of the

*TPS* genes on seven chromosomes of *C. camphora*. (d) Tissue-specific expressions of *TPS-a*, *TPS-b*

and *TPS-g* subfamilies.

396

397

398

The biosynthetic pathways of terpenoids are derived from isopentenyl diphosphate

(IPP) and dimethylallyl diphosphate (DMAPP) produced via the methylerythritol

phosphate (MEP) and mevalonate (MVA) pathways, respectively (Li et al., 2019; Zhou

and Pichersky, 2020). Comparative transcriptome analyses of samples from the four

locations were performed to examine the expression patterns of genes involved in the

MEP and MVA pathways. We combined four differentially expressed gene (DEG) sets

identified in Liuzhou vs. Qinzhou, Liuzhou vs. Nanning, Baise vs. Qinzhou and Baise

vs. Nanning (Figure S11). We detected 22 and 23 DEGs in the MEP and MVA

pathways, respectively (Figure 6; Table S20). Generally, the DEGs involved in all the

steps of the MEP and MVA pathways showed higher expression in Baise and Liuzhou

than in Qinzhou and Nanning, except for the

*2-C-methyl-D-erythritol-2,4-cyclodiphosphate synthase (MDS)* gene, which was

absent in the combined DEG set. The same expression pattern was observed for the

410

411 genes related to downstream steps, including *isopentenyl diphosphate isomerase*  
 412 (*IDI*), *geranyl diphosphate synthetase* (*GPPS*), *farnesyl diphosphate synthetase*  
 413 (*FPPS*), *TPS-a*, *TPS-b* and *TPS-g*. The modulation of gene expression in the  
 414 terpenoid biosynthesis pathway echoed the higher accumulation of monoterpenoids  
 415 and sesquiterpenoids observed in Baise and Liuzhou than in Qinzhou and Nanning.  
 416

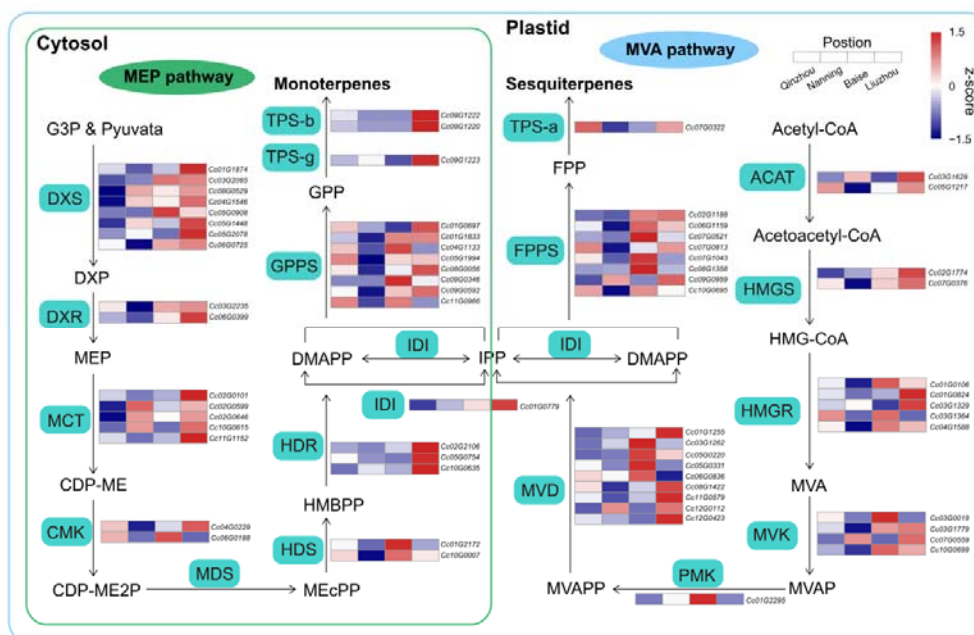

417  
 418 **Figure 6** Biosynthetic pathways of monoterpenoids and sesquiterpenoids. Relative expression profiling  
 419 of genes involved in volatile terpenoid biosynthesis among the four planting locations (Qinzhou, Nanning,  
 420 Baise and Liuzhou). Gene expression was extracted from the combined differentially expressed gene  
 421 (DEG) set (Liuzhou vs. Qinzhou, Liuzhou vs. Nanning, Baise vs. Qinzhou and Baise vs. Nanning). MEP,  
 422 mevalonate pathway; MEP, methylerythritol phosphate pathway; ACAT, acyl-coenzyme A-cholesterol  
 423 acyl-transferase; HMGS, hydroxymethylglutaryl coenzyme A synthase; HMGR, hydroxymethylglutaryl  
 424 coenzyme A reductase; MVK, mevalonate kinase; PMK, phospho-mevalonate kinase; MVD, mevalonate  
 425 diphosphate decarboxylase; DXS, 1-deoxy-D-xylulose 5-phosphate synthase; DXR, 1-deoxy-D-xylulose  
 426 5-phosphate reductoisomerase; MCT, 2-C-methyl-D-erythritol-4-phosphate cytidyltransferase; CMK,  
 427 4-(cytidine-5-diphospho)-2-C-methyl-D-erythritol kinase; MDS,  
 428 2-C-methyl-D-erythritol-2,4-cyclodiphosphate synthase; HDS,  
 429 (E)-4-hydroxy-3-methyl-but-2-enyl-pyrophosphate synthase; HDR,  
 430 (E)-4-hydroxy-3-methyl-but-2-enyl-pyrophosphate reductase.

### 432 Climatic factors underlying the top-geoherbalism of *C. camphora*

433 To determine what climatic factors caused the differences in volatile metabolites  
 434 among the *C. camphora* plants of the same genotype grown in different locations  
 435 (Figure 7a), we downloaded the climate data of Qinzhou, Nanning, Baise and Liuzhou  
 436 from three years (2018-2020) from the National Meteorological Information Centre  
 437 (<http://data.cma.cn/en>). The 17 climatic factors could be classified into

438 temperature-related, wind-related, pressure-related, precipitation-related,  
439 humidity-related and sunshine-related factors. (Table S21; Table S22).

440 PCAs of the climatic factors showed that PC1 (accounting for 53.2% of the total  
441 variance) separated Liuzhou from Qinzhou, Nanning and Baise, while PC2  
442 (accounting for 25.8% of the total variance) split Baise from Qinzhou, Nanning and  
443 Liuzhou (Figure 7b). To examine the contributions of climatic factors to PC1 and PC2,  
444 we loaded them in the PCA plot (Figure 7c). Temperature-related factors were the  
445 main variables contributing to PC1, including mean minimum temperature (16.88%),  
446 mean temperature (16.32%) and mean maximum temperature (14.50%), and  
447 precipitation-related factors mainly contributed to PC2, including daily precipitation  
448 (27.29%) and maximum daily precipitation (19.75%) (Figure 7d).

449 To examine the detailed differences in temperature- and precipitation-related  
450 factors in these four locations, we plotted the monthly observations of mean minimum  
451 temperature, mean temperature, mean maximum temperature, daily precipitation and  
452 maximum daily precipitation (main contributors to PC1 and PC2) from 2018 to 2020  
453 (Figure 7e, f; Figure S12; Table S22). The mean temperature of Liuzhou was much  
454 lower than those of the other locations, especially in the two colder quarters of the  
455 year. Additionally, daily precipitation was lower in Baise than in the other locations,  
456 especially in early spring. All of these results suggested that relatively low  
457 temperature and precipitation during the cold season imposes some degree of stress  
458 on the plants and thus stimulated the production of the desired terpenoids in *C.*  
459 *camphora*.

460

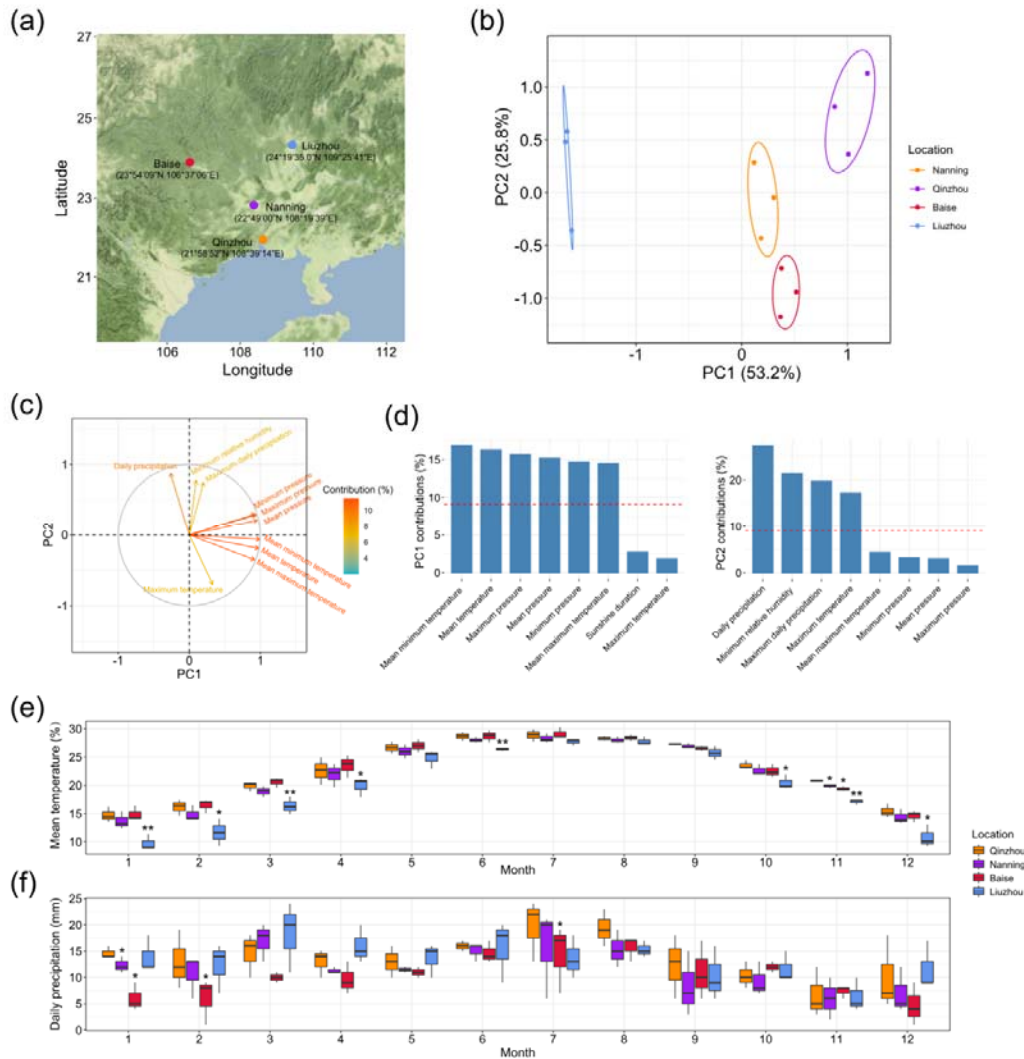

461  
 462 **Figure 7** Analyses of climatic factors in different planting locations. (a) Geographical distribution of *C.*  
 463 *camphora* planting locations, including Qinzhou, Nanning, Baise and Liuzhou. (b) Principal component  
 464 analyses (PCA) of seventeen climatic factors in the four planting locations in 2018, 2019 and 2020. (c)  
 465 The loadings of climatic factors in the PCA plot. The colours of the arrows represent the percentages of  
 466 the contributions of climatic factors to the PCs. (d) Histograms of the percentages of the contributions of  
 467 different climatic factors to PC1 and PC2. The red dashed lines indicate the average contributions of  
 468 different climatic factors. Only the top eight climatic factors are shown. (e) Monthly observations of the  
 469 mean temperature in the four planting locations. Single and double asterisks indicate statistically  
 470 significance levels of  $P < 0.05$  and  $P < 0.01$ , respectively, between Liuzhou and Qinzhou/Nanning  
 471 (paired-sample Student's *t* test). (f) Monthly observations of daily precipitation in the four planting  
 472 locations. A single asterisk indicates the statistically significance levels of  $P < 0.05$  between Baise and  
 473 Qinzhou/Nanning (paired-sample Student's *t* test).

474

## 475 Discussion

476 Here, by decoding the genome of the camphor tree, we revealed that magnoliids are a  
 477 sister group to the clade of eudicots and monocots. The two rounds of WGD identified

478 in *C. camphora* were dated to ca. 85.66 Mya and 137.90 Mya, respectively. The  
479 former was shared with Lauraceae species, and the latter occurred before the  
480 divergence of Lauraceae and Calycanthaceae. We found that rapidly evolving TD  
481 genes play key roles in the synthesis of secondary metabolites, especially for  
482 monoterpenes and sesquiterpenes. By analysing volatile metabolites in leaves  
483 sampled from plants of the same genotype grown in four different locations, we found  
484 higher accumulation of the key volatile metabolites in regions with lower temperature  
485 and precipitation in the cold season, which was attributed to the differential expression  
486 of genes related to the MVA and MEP pathways as well as their downstream steps in  
487 terpene biosynthesis. Our study confirmed that abiotic stress contributes to the  
488 development of top-geoh herbs, laying a theoretical foundation for policy making on the  
489 agroforestry applications of camphor trees.

490 In addition to releasing the first chromosome-level genome of this significant  
491 economic tree species, our study is innovative in two regards. First, it is among the  
492 very few innovative three-dimensional evaluations of the top-geoh herbalism of a TCM  
493 species, integrating phytochemical, genetic and climatic analyses of camphor tree  
494 germplasm (Li et al., 2017). Second, our study is the first to fix the genotypic variation  
495 of the germplasm so that it is feasible to investigate how climatic factors alone affect  
496 the accumulation of metabolites (Li et al., 2020; Mandim et al., 2021). By integrating  
497 these two novel approaches, our study provides an example of how to  
498 comprehensively scrutinize the genetic and climatic factors affecting the composition  
499 of secondary metabolites.

500 The dominant climatic factors affecting the secondary metabolites of the camphor  
501 tree are not always the key factors affecting in other traditional herbs. For example,  
502 humidity and sunshine time are the chief limiting factors in the production of artemisinin  
503 in *Artemisia annua* L. (Li et al., 2017). Additionally, lower temperature in the coldest  
504 quarter imposes stress on camphor tree and increases the production of desired  
505 volatile compounds. In other cases, a higher temperature imposes stress and  
506 enhances the production of desired metabolites (Liu et al., 2020). The limiting  
507 ecological and climatic factors depended on the native ranges of the herbs and climatic  
508 conditions during their growing season (Körner, 2021). A thorough investigation of  
509 each specific case would be beneficial for decision making.

510 Some caveats need to be considered when interpreting our results. First, broader  
511 planting of the same genotype (i.e., covering all provinces in South China and even  
512 some Southeast Asian countries) would provide a thorough understanding of the  
513 optimal climatic variables resulting in the greatest consistency and efficacy of the  
514 medicinal components of camphor tree (Sharma et al., 2020). Second, the further  
515 experimental verification of the effect of temperature on metabolite contents and the  
516 functional validation of selected candidate genes (such as *TPS-b*, *TPS-g*, or *TPS-a*) of  
517 the biosynthetic pathway under controlled laboratory conditions would enhance our  
518 conclusions (Lau and Sattely, 2015; Nett et al., 2020). Third, soil characteristics  
519 (including nutritional status, humidity and rhizosphere microorganisms, etc.) are  
520 crucial for the accumulation of secondary metabolites (Ciancio et al., 2019; de Vries et



521 al., 2020). However, owing to the absence of appropriate data for assessing these  
522 characteristics, we overlooked ecological factors such as soil conditions. Further  
523 studies addressing the abovementioned limitations would provide an in-depth  
524 framework for understanding the genetic and environmental factors related to  
525 top-geoherbalism.

526 Taken together, our results lay a theoretical foundation for the optimal production of  
527 this economically significant tree species. The distributional range of camphor tree  
528 largely overlaps with the land and maritime portions of the silk road of the Belt and  
529 Road Initiative (Hinsley et al., 2020); thus, products obtained from camphor tree, such  
530 as TCMs or essential oil, show a high chance of being exported to connected countries  
531 in the Middle West, Western Europe and even North Africa. As tissue culture methods  
532 for camphor trees are well established and the growth rate of the trees is relatively fast  
533 (Shi et al., 2010), the commercial cultivation of trees *ex situ* is probably a sustainable  
534 and economic method in addition to importation (Brinckmann, 2015). Thus, our  
535 research will provide guidance for policy making, genotype selection and the  
536 optimization of climatic conditions for growth by domestic and international  
537 government stakeholders, farmers, merchandisers and consumers.

538

## 539 **Methods**

### 540 **Plant materials**

541 The sequences utilized for *de novo* genome assembly of the genome were obtained  
542 from the fresh leaves of a single camphor tree (*C. camphora* var. *linaloolifera* Fujita;  
543 NO.95), grown at Guangxi Forestry Research Institute.

544 Tissue-cultured seedlings were planted in four locations in Guangxi Province in  
545 China in May 2018, including Qinzhou (21°58'52"N, 108°39'14"E), Nanning  
546 (22°49'00"N, 108°19'39"E), Baise (23°54'09"N, 106°37'06"E) and Liuzhou  
547 (24°19'35.0"N, 109°25'41"E). Fresh leaves were collected from the four locations for  
548 RNA-Seq analyses and volatile compound quantification in November 2020.

549

### 550 **DNA sequencing**

551 High-molecular-weight (HMW) genomic DNA was extracted using a DNeasy Plant  
552 Mini Kit (Qiagen, USA), and 50 µg of HMW genomic DNA was prepared to generate  
553 SMRTbellTM libraries with a 20 kb insert size. Subsequently, PacBio circular  
554 consensus sequencing (CCS) data were produced on the PacBio Sequel II platform.  
555 Hi-C libraries were constructed from the tender leaves of *C. camphora* with fragments  
556 labelled with biotin and sequenced on the Illumina NovaSeq 6000 platform.

557

### 558 **RNA sequencing**

559 Total RNA was extracted from each sample by using an RNAPrep Pure Plant kit  
560 (TIANGEN, Beijing, China) according to the user manual. cDNA was synthesized from  
561 20 µg of total RNA using Rever Tra Ace (TOYOBO, Osaka, Japan) with oligo (dT)  
562 primers following the user manual. High-throughput sequencing was then performed  
563 on the Illumina NovaSeq 6000 platform.

564

565 **De novo genome assembly and quality assessment**

566 The *C. camphora* genome was assembled by integrating the sequencing data  
567 obtained with PacBio CCS technology and the Hi-C method using Hifiasm (Cheng et  
568 al., 2021) with the default parameters. We assembled two contig-level genomes,  
569 including a monoploid genome (haplotype A) and an allele-defined genome  
570 (haplotype B). Before Hi-C scaffolding, we filtered the redundant contigs from the  
571 contig-level genomes by using Purge\_haplotigs (Roach et al., 2018). The Hi-C reads  
572 were assessed with the HiC-Pro program (Servant et al., 2015) and uniquely mapped  
573 to the contig assemblies. Juicer tools (Durand et al., 2016) and 3D-DNA pipelines  
574 (Dudchenko et al., 2017) were used to perform chromosome scaffolding. The BUSCO  
575 (Seppey et al., 2019) method was used to evaluate the completeness of the  
576 chromosome-level genomes.

577

578 **Repetitive sequences and gene annotation**

579 We used the EDTA pipeline (Ou et al., 2019) to annotate transposable elements in the  
580 *C. camphora* genome, including LTR, TIR and nonTIR elements. LAI assessment and  
581 LTR insertion time estimation were performed by LTR\_retriever (Ou and Jiang, 2018)  
582 with the synonymous substitution rate set as 3.02e-9 (Cui et al., 2006). TRF software  
583 (Benson, 1999) with modified parameters (“trf 1 1 2 80 5 200 2000”) was used to  
584 identify tandem repeats.

585 For gene model annotation, we trained *ab initio* gene predictors, including  
586 AUGUSTUS (Stanke and Morgenstern, 2005) and SNAP (Korf, 2004), on the  
587 repeat-masked genome using a combination of protein and transcript data. We used  
588 the annotated proteome data of *A. thaliana*, *L. chinense* (Chen et al., 2019), *C.*  
589 *kanehirae* (Chaw et al., 2019) and *P. americana* (Rendón-Anaya et al., 2019) and the  
590 Swiss-Prot database as the protein data. We employed RNA-Seq data from the four  
591 locations as the transcript data. To train AUGUSTUS, BRAKER2 (Bruna et al., 2021)  
592 was applied with the transcript data from aligned RNA-Seq bam files produced by  
593 Hisat2 (Kim et al., 2015). SNAP was trained under MAKER (Cantarel et al., 2008) with  
594 two iterations. Transcript data were supplied in the form of a *de novo* assembled  
595 transcriptome generated in Trinity (Haas et al., 2013) and a reference-based  
596 assembly generated by StringTie (Pertea et al., 2016). After training, the AUGUSTUS  
597 and SNAP results were fed into MAKER again along with all other data to produced  
598 synthesized gene models.

599 Functional annotations of the protein-coding sequences were obtained via BLASTP  
600 (“-evalue 1e-10”) searches against entries in both the NR and Swiss-Prot databases.  
601 The prediction of gene sequence motifs and structural domains was performed using  
602 InterProScan (Jones et al., 2014). The annotations of the GO terms and KEGG  
603 pathways of the genes were obtained from eggNOG-mapper (Huerta-Cepas et al.,  
604 2017).

605

606 **Phylogenetic analyses and estimation of divergent times**

607 A total of 16 plant species, including five magnoliids (*C. camphora*, *C. kanehirae*, *P.*  
608 *americana*, *Ch. salicifolius* and *L. chinense*), four monocots (*Zea mays*, *Oryza sativa*,

609 *Ananas comosus* and *Musa acuminata*), five eudicots (*A. thaliana*, *Populus*  
610 *trichocarpa*, *Medicago truncatula*, *Solanum lycopersicum* and *V. vinifera*) and two  
611 ANA-grade species (*Nymphaea colorata* and *Amborella trichopoda*) were used to  
612 infer the phylogenetic tree. All genomes except for that of *Ch. salicifolius*  
613 ([http://xhhuanglab.cn/data/Chimonanthus\\_salicifolius.html](http://xhhuanglab.cn/data/Chimonanthus_salicifolius.html)) were downloaded from  
614 JGI (<ftp://ftp.jgi-psf.org/pub/compngen/phytozome/v12.0/>) and Ensembl Plants  
615 (<http://plants.ensembl.org/info/data/ftp/index.html>). Paralogues and orthologues were  
616 identified among the 16 species by using the OrthoFinder pipeline (Emms and Kelly,  
617 2019) with the default parameters, and the protein sequences of the 172 identified  
618 single-copy orthologous genes were used for the construction of the phylogenetic tree.  
619 The concatenated amino acid sequences were aligned with MAFFT (Kato and  
620 Standley, 2013) and trimmed with trimAl (Capella-Gutiérrez et al., 2015). A maximum  
621 likelihood (ML) phylogenetic tree was constructed using IQ-TREE (Nguyen et al.,  
622 2015) with ultrafast bootstrapping (-bb 1000), using *N. colorata* and *A. trichopoda* as  
623 outgroups. The best-fitting substitution models were selected by ModelFinder  
624 (Kalyaanamoorthy et al., 2017). In addition, ASTRAL-III v5.7.3 (Zhang et al., 2018)  
625 was applied to infer the coalescence-based species tree with 172 gene trees. The  
626 species tree was then used as an input to estimate the divergence time in the  
627 MCMCTree program in the PAML package (Yang et al., 2007). The calibration time  
628 was obtained from TimeTree (Kumar et al., 2017): 107-135 Mya for the divergence of  
629 *V. vinifera* and *A. thaliana*, 42-52 Mya for *Z. mays* and *O. sativa*, 97-116 Mya for *O.*  
630 *sativa* and *M. acuminata* and 173-199 Mya for *A. trichopoda* and *A. thaliana*. The  
631 expansion and contraction of gene families were inferred with CAFÉ (De Bie et al.,  
632 2006) based on the chronogram of the 16 species

633

#### 634 **Genome duplication and syntenic analyses**

635 To identify the pattern of genome-wide duplications in *C. camphora*, we divided  
636 duplicated genes into five categories, WGD, TD, PD (duplicated genes separated by  
637 less than 10 genes on the same chromosome), TRD, and DSD (the remaining  
638 duplicates other than the four specified types) gene, using DupGen\_Finder (Qiao et  
639 al., 2019) with the default parameters. The *Ka*, *Ks*, and *Ka/Ks* values were estimated  
640 for duplicated gene pairs based on the YN model in *KaKs\_Calculator2* (Wang et al.,  
641 2010), followed by the conversion of amino acid alignments into the corresponding  
642 codon alignments with PAL2NAL (Suyama et al., 2006). The genes in the five  
643 duplicate categories were further subjected to GO and KEGG analyses with the R  
644 package clusterProfiler (Yu et al., 2012). The enriched items were selected according  
645 to an FDR criterion of 0.05. The dating of ancient WGDs and orthologue divergence  
646 were estimated based on the formula  $T = Ks/2r$ , where *Ks* refers to the synonymous  
647 substitutions per site, and *r* (3.02e-9) is the synonymous substitution rate for  
648 magnoliids (Cui et al., 2006).

649 Genomic synteny blocks to be employed for intra- and interspecies comparisons  
650 among magnoliids were identified with MCscan software (Tang et al., 2008). We  
651 performed all-against-all LAST analyses (Kielbasa et al., 2011) and chained the LAST  
652 hits according to a distance cut-off of 10 genes, requiring at least five gene pairs per

653 synteny block. The syntenic “depth” function implemented in MCscan was applied to  
654 estimate the duplication histories of the respective genomes. Genomic synteny was  
655 visualized with the Python version of MCScan (Tang et al., 2008), the R package  
656 Rldeogram (Hao et al., 2020) and Circos (Krzywinski et al., 2009).

657

### 658 **Gene expression profiling**

659 The raw RNA-Seq data were filtered by using FASTP (Chen et al., 2018). The clean  
660 data were aligned to our assembled *C. camphora* genome with Hisat2 (Kim et al.,  
661 2015), and the quantification of gene expression was calculated with StringTie (Pertea  
662 et al., 2015). The Python script preDE.py built into StringTie was used to convert the  
663 quantification results into a count matrix. DEGs were detected with the DESeq2 R  
664 package (Love et al., 2014) with an FDR < 0.05.

665

### 666 **TPS gene family**

667 *TPS* genes are classified into seven subfamilies, including *TPS-a*, *TPS-b*, *TPS-c*,  
668 *TPS-d*, *TPS-e*, *TPS-f* and *TPS-g* (Chen et al., 2011). The *TPS* genes included in the  
669 *TPS-a* subfamily are responsible for forming 15-carbon sesquiterpenoids. The *TPS-b*  
670 and *TPS-g* superfamilies encode the enzymes producing 10-carbon monoterpenoids.  
671 The *TPS-c*, *TPS-e* and *TPS-f* subfamilies encode diterpene synthases, which  
672 catalyse the formation of 20-carbon isoprenoids. The *TPS-d* subfamily is gymnosperm  
673 specific and encodes enzymes involved in the production of 20-carbon isoprenoids  
674 (Martin et al., 2004). The *TPS* genes were predicted based on both their conserved  
675 domains (PF01397 and PF03936) and BLAST analyses. Conserved domains were  
676 used as search queries against the predicted proteome using hmmsearch in HMMER  
677 (<https://www.ebi.ac.uk/Tools/hmmer/>). *TPS* protein sequences from *A. thaliana* and *C.*  
678 *kanehirae* were used as queries to identify the *TPS* genes of *C. camphora*, *P.*  
679 *americana*, *L. chinense* and *V. vinifera*. The protein sequence hits of *TPS* genes were  
680 aligned with MAFFT (Kato and Standley, 2013) and trimmed with trimAl  
681 (Capella-Gutierrez et al., 2009). The *TPS* gene tree was constructed using RAxML  
682 (Stamatakis, 2014) with 1,000 bootstrap replicates. The *TPS-c* subfamily was  
683 designated as the outgroup. The distribution of *TPS* genes on the chromosomes was  
684 visualized in TBtools (Chen et al., 2020).

685

### 686 **Identification of genes involved in the MVA and MEP pathways**

687 The MVA pathway involves six gene families, including the *acyl-coenzyme*  
688 *A-cholesterol acyl-transferase (ACAT)*, *hydroxymethylglutaryl coenzyme A synthase*  
689 *(HMGS)*, *hydroxymethylglutaryl coenzyme A reductase (HMGR)*, *mevalonate kinase*  
690 *(MVK)*, *phospho-mevalonate kinase (PMK)*, and *mevalonate diphosphate*  
691 *decarboxylase (MVD)* genes. Seven gene families are involved in the MEP pathway,  
692 including the *1-deoxy-D-xylulose 5-phosphate synthase (DXS)*, *1-deoxy-D-xylulose*  
693 *5-phosphate reductoisomerase (DXR)*, *2-C-methyl-D-erythritol-4-phosphate*  
694 *cytidyltransferase (MCT)*, *4-(cytidine-5-diphospho)-2-C-methyl-D-erythritol kinase*  
695 *(CMK)*, *MDS*, *(E)-4-hydroxy-3-methyl-but-2-enyl-pyrophosphate synthase (HDS)* and  
696 *(E)-4-hydroxy-3-methyl-but-2-enyl-pyrophosphate reductase (HDR)* genes. The

697 genes in both the MVA and MEP pathways are well documented in the model plants.  
698 To identify candidate genes related to the two pathways in the *C. camphora* genome,  
699 we collected the protein sequences of genes in the MVA and MEP pathways identified  
700 in *A. thaliana*. Using each *A. thaliana* gene as a query sequence, BLASTP (“-evaluate  
701 1e-10”) analyses was performed to identify orthologous genes in *C. camphora*.

702

### 703 **Determination of volatile metabolites**

704 Six biological replicates were sampled in each location. The samples were ground  
705 into powder in liquid nitrogen. Two grams of the powder was transferred to a 20 ml  
706 headspace vial. The vials were sealed using crimp-top caps with TFE-silicone  
707 headspace septa. In solid-phase microextraction (SPME) analyses, each vial was  
708 placed at 60°C for 12 min, and a 65 µm  
709 divinylbenzene/carboxene/polydimethylsiloxane fibre (Supelco, Bellefonte, PA, USA)  
710 was then exposed to the headspace of the sample for 30 min at 60°C. Volatile  
711 metabolites were detected by MetWare (<http://www.metware.cn/>) based on the Agilent  
712 7890B-7000D platform. The desorption of the volatile metabolites from the fibre  
713 coating was carried out in the injection port of the GC apparatus at 250°C for 10 min in  
714 spitless mode. The identification and quantification of volatile metabolites were carried  
715 out with a 30 m x 0.25 mm x 1.0 µm DB-5MS (5% phenyl-polymethylsiloxane)  
716 capillary column. Helium was used as the carrier gas at a linear velocity of 1.0 ml/min.  
717 The oven temperature was programmed to increase from 40°C (6 min) at 5°C/min  
718 until it reached 280°C, where it was held for 5 min. Mass spectra were recorded in  
719 electron impact (EI) ionization mode at 70 eV. The quadrupole mass detector, ion  
720 source and transfer line temperatures were set at 150, 230 and 280°C, respectively.  
721 Volatile compounds were identified by comparing the mass spectra with the data  
722 system library (MWGC) and linear retention index.

723

### 724 **Climatic factor collection and analyses**

725 Data on 17 climatic factors from Qinzhou, Nanning, Baise and Liuzhou from 2018 to  
726 2020 were downloaded from the National Meteorological Information Centre  
727 (<http://data.cma.cn/en>). The analyses of the climatic factors were performed in the R  
728 package FactoMineR (Lê et al., 2008).

729

### 730 **Funding information**

731 This study was supported by the National Key Research and Development Program  
732 of China (Grant No. 2020YFA0907900), Genomic Studies on the Differences in the  
733 Secondary Metabolism of Camphor Tree under Different Site conditions (Grant No.  
734 JA-20-04-07 and Grant No. 202102), the National Natural Science Foundation of  
735 China (Grant No. 32070242), the Shenzhen Science and Technology Program (Grant  
736 No. KQTD2016113010482651), special funds for science technology innovation and  
737 industrial development of Shenzhen Dapeng New District (Grant No. RC201901-05  
738 and Grant No. PT201901-19), the China Postdoctoral Science Foundation (Grant No.  
739 2020M672904), the Basic and Applied Basic Research Fund of Guangdong (Grant No.  
740 2020A1515110912) and the USDA Agricultural Research Service Research



741 Participation Program of the Oak Ridge Institute for Science and Education (ORISE)  
742 (Grant No. DE-AC05-06OR23100).

743

#### 744 **Conflict of interest**

745 No conflict of interest was declared.

746

#### 747 **Author contributions**

748 L.W., C.L. K.X.L. and R.H.J. conceived and designed the study; R.H.J., X.L.C., C.S.Z.,  
749 P.W. and K.X.L. prepared the materials; C.L., X.L.C., X.Z.L., D.P. and X.X.H.  
750 performed data analyses; R.H.J., X.L.C., D.E.H, C.L. and L.W. wrote the manuscript;  
751 all authors read and approved the final draft.

752

#### 753 **Data availability**

754 All the raw sequence reads of *C. camphora* have been deposited in NCBI under the  
755 BioProject accession number PRJNA761572. The *C. camphora* genome assembly  
756 and annotations have been deposited on the cyVerse platform  
757 ([https://data.cyverse.org/dav-anon/iplant/home/licheng\\_caas/C.camphora\\_genome](https://data.cyverse.org/dav-anon/iplant/home/licheng_caas/C.camphora_genome)).

758

#### 759 **Reference**

- 760 Brinckmann, J.A. (2015) Geographical indications for medicinal plants: Globalization,  
761 climate change, quality and market implications for geo-authentic botanicals.  
762 *World J. Trad. Chinese Med.* **1**,16-23.
- 763 Benson, G. (1999) Tandem repeats finder: a program to analyze DNA sequences.  
764 *Nucleic Acids Res.* **27**,573-580.
- 765 Bottoni, M., Milani, F., Mozzo, M., Radice Kolloffel, D.A., Papini, A., Fratini, F., Maggi,  
766 F. and Santagostini, L. (2021) Sub-tissue localization of phytochemicals in  
767 *Cinnamomum camphora* (L.) J. Presl. growing in Northern Italy. *Plants* **10**,1008.
- 768 Bruna, T., Hoff, K.J., Lomsadze, A., Stanke, M. and Borodovsky, M. (2021) BRAKER2:  
769 automatic eukaryotic genome annotation with GeneMark-EP+ and AUGUSTUS  
770 supported by a protein database. *NAR Genom. Bioinform.* **3**,a108.
- 771 Cantarel, B.L., Korf, I., Robb, S.M., Parra, G., Ross, E., Moore, B., Holt, C., Sanchez,  
772 A.A. and Yandell, M. (2008) MAKER: an easy-to-use annotation pipeline  
773 designed for emerging model organism genomes. *Genome Res.* **18**,188-196.
- 774 Capella-Gutiérrez, S., Silla-Martinez, J.M. and Gabaldón, T. (2009) TrimAl: a tool for  
775 automated alignment trimming in large-scale phylogenetic analyses.  
776 *Bioinformatics* **25**,1972-1973.
- 777 Chaw, S., Liu, Y., Wu, Y., Wang, H., Lin, C.I., Wu, C., Ke, H., Chang, L., Hsu, C.,  
778 Yang, H., Sudianto, E., Hsu, M., Wu, K., Wang, L., Leebens-Mack, J.H. and Tsai,  
779 I.J. (2019) Stout camphor tree genome fills gaps in understanding of flowering  
780 plant genome evolution. *Nat. Plants* **5**,63-73.
- 781 Chen, C., Chen, H., Zhang, Y., Thomas, H.R., Frank, M.H., He, Y. and Xia, R. (2020)  
782 TBtools: An Integrative Toolkit developed for interactive analyses of big biological  
783 data. *Mol. Plant* **13**,1194-1202.
- 784 Chen, C., Zheng, Y., Liu, S., Zhong, Y., Wu, Y., Li, J., Xu, L. and Xu, M. (2017) The

- 785 complete chloroplast genome of *Cinnamomum camphora* and its comparison  
786 with related Lauraceae species. *PeerJ* **5**,e3820.
- 787 Chen, C., Zhong, Y., Yu, F. (2020) Deep sequencing identifies miRNAs and their  
788 target genes involved in the biosynthesis of terpenoids in *Cinnamomum*  
789 *camphora*. *Ind. Crop Prod.* **145**,111853.
- 790 Chen, F., Tholl, D., Bohlmann, J. and Pichersky, E. (2011) The family of terpene  
791 synthases in plants: a mid-size family of genes for specialized metabolism that is  
792 highly diversified throughout the kingdom. *Plant J.* **66**,212-229.
- 793 Chen, J., Hao, Z., Guang, X., Zhao, C., Wang, P., Xue, L., Zhu, Q., Yang, L., Sheng,  
794 Y., Zhou, Y., Xu, H., Xie, H., Long, X., Zhang, J., Wang, Z., Shi, M., Lu, Y., Liu, S.,  
795 Guan, L., Zhu, Q., Yang, L., Ge, S., Cheng, T., Laux, T., Gao, Q., Peng, Y., Liu,  
796 N., Yang, S. and Shi, J. (2019) *Liriodendron* genome sheds light on angiosperm  
797 phylogeny and species-pair differentiation. *Nat. Plants* **5**,18-25.
- 798 Chen, S., Sun, W., Xiong, Y., Jiang, Y., Liu, X., Liao, X., Zhang, D., Jiang, S., Li, Y.,  
799 Liu, B., Ma, L., Yu, X., He, L., Liu, B., Feng, J., Feng, L., Wang, Z., Zou, S., Lan,  
800 S. and Liu, Z. (2020) The *Phoebe* genome sheds light on the evolution of  
801 magnoliids. *Hortic. Res.* **7**,146.
- 802 Chen, S., Zhou, Y., Chen, Y. and Gu, J. (2018) Fastp: an ultra-fast all-in-one FASTQ  
803 preprocessor. *Bioinformatics*, **34**, i884-i890.
- 804 Chen, Y., Li, Z., Zhao, Y., Gao, M., Wang, J., Liu, K., Wang, X., Wu, L., Jiao, Y., Xu, Z.,  
805 He, W., Zhang, Q., Liang, C., Hsiao, Y., Zhang, D., Lan, S., Huang, L., Xu, W.,  
806 Tsai, W., Liu, Z., Van de Peer, Y. and Wang, Y. (2020) The *Litsea* genome and  
807 the evolution of the laurel family. *Nat. Commun.* **11**,1675.
- 808 Cheng, H., Concepcion, G.T., Feng, X., Zhang, H. and Li, H. (2021)  
809 Haplotype-resolved *de novo* assembly using phased assembly graphs with  
810 hifiasm. *Nat. Methods* **18**,170-175.
- 811 Ciancio, A., Pieterse, C.M.J. and Mercado-Blanco, J. Editorial: Harnessing useful  
812 rhizosphere microorganisms for pathogen and pest biocontrol - second edition.  
813 *Front. Microbiol.* **10**,1935.
- 814 Consultation Shenzhen Limu Information (2021) China's linalool industry market  
815 development scale and forecast in 2021.
- 816 Cui, L., Wall, P.K., Leebens-Mack, J.H., Lindsay, B.G., Soltis, D.E., Doyle, J.J., Soltis,  
817 P.S., Carlson, J.E., Arumuganathan, K., Barakat, A., Albert, V.A., Ma, H. and  
818 DePamphilis, C.W. (2006) Widespread genome duplications throughout the  
819 history of flowering plants. *Genome Res.* **16**,738-749.
- 820 De Bie, T., Cristianini, N., Demuth, J.P. and Hahn, M.W. (2006) CAFÉ: a  
821 computational tool for the study of gene family evolution. *Bioinformatics* **22**,  
822 1269-1271.
- 823 de Vries, F.T., Griffiths, R.I., Knight, C.G., Nicolitch, O. and Williams, A. (2020)  
824 Harnessing rhizosphere microbiomes for drought-resilient crop production.  
825 *Science* **368**,270-274.
- 826 Dudchenko, O., Batra, S.S., Omer, A.D., Nyquist, S.K., Hoeger, M., Durand, N.C.,  
827 Shamim, M.S., Machol, I., Lander, E.S., Aiden, A.P. and Aiden, E.L. (2017) *De*  
828 *nov* assembly of the *Aedes aegypti* genome using Hi-C yields

- 829 chromosome-length scaffolds. *Science* **356**,92-95.
- 830 Durand, N.C., Shamim, M.S., Machol, I., Rao, S.S., Huntley, M.H., Lander, E.S. and  
831 Aiden, E.L. (2016) Juicer provides a one-click system for analyzing  
832 loop-resolution Hi-C experiments. *Cell Syst.* **3**,95-98.
- 833 Eggersdorfer, M. (2000) *Terpenes*". *Ullmann's Encyclopedia of Industrial Chemistry*.
- 834 Emms, D.M. and Kelly, S. (2019) OrthoFinder: phylogenetic orthology inference for  
835 comparative genomics. *Genome Biol.* **20**,238.
- 836 Endress, P.K. and Doyle, J.A. (2009) Reconstructing the ancestral angiosperm flower  
837 and its initial specializations. *Am. J. Bot.* **96**,22-66.
- 838 Haas, B.J., Papanicolaou, A., Yassour, M., Grabherr, M., Blood, P.D., Bowden, J.,  
839 Couger, M.B., Eccles, D., Li, B., Lieber, M., MacManes, M.D., Ott, M., Orvis, J.,  
840 Pochet, N., Strozzi, F., Weeks, N., Westerman, R., William, T., Dewey, C.N.,  
841 Henschel, R., LeDuc, R.D., Friedman, N. and Regev, A. (2013) *De novo*  
842 transcript sequence reconstruction from RNA-seq using the Trinity platform for  
843 reference generation and analyses. *Nat. Protoc.* **8**,1494-1512.
- 844 Hamidpour, R., Hamidpour, S., Hamidpour, M. and Shahlari, M. (2012) Camphor  
845 (*Cinnamomum camphora*), a traditional remedy with the history of treating  
846 several diseases. *Int. J. Case Rep. Images* **4**,86.
- 847 Hao, Z., Lv, D., Ge, Y., Shi, J., Weijers, D., Yu, G., Chen, J. (2020) Rldeogram:  
848 drawing SVG graphics to visualize and map genome-wide data on the idiograms.  
849 *PeerJ Comput. Sci.* **6**, e251.
- 850 Hinsley, A., Milner-Gulland, E.J., Cooney, R., Timoshyna, A., Ruan, X.D. and Lee, T.M.  
851 (2020) Building sustainability into the Belt and Road Initiative's Traditional  
852 Chinese Medicine trade. *Nat. Sustain.* **3**,96-100.
- 853 Hou, J., Zhang, J., Zhang, B., Jin, X., Zhang, H. and Jin, Z. (2020) Transcriptional  
854 analyses of metabolic pathways and regulatory mechanisms of essential oil  
855 biosynthesis in the leaves of *Cinnamomum camphora* (L.) Presl. *Front. Genet.*  
856 **11**,598714.
- 857 Hu, L., Xu, Z., Wang, M., Fan, R., Yuan, D., Wu, B., Wu, H., Qin, X., Yan, L., Tan, L.,  
858 Sim, S., Li, W., Saski, C.A., Daniell, H., Wendel, J.F., Lindsey, K., Zhang, X., Hao,  
859 C. and Jin, S. (2019) The chromosome-scale reference genome of black pepper  
860 provides insight into piperine biosynthesis. *Nat. Commun.* **10**,4702.
- 861 Huang, L. (2012) *Molecular Pharmacognosy*. Shanghai Scientific and Technical  
862 Publishers.
- 863 Huerta-Cepas, J., Forslund, K., Coelho, L.P., Szklarczyk, D., Jensen, L.J., von Mering,  
864 C. and Bork, P. (2017) Fast genome-wide functional annotation through orthology  
865 assignment by eggNOG-Mapper. *Mol. Biol. Evol.* **34**,2115-2122.
- 866 Jones, P., Binns, D., Chang, H.Y., Fraser, M., Li, W., McAnulla, C., McWilliam, H.,  
867 Maslen, J., Mitchell, A., Nuka, G., Pesseat, S., Quinn, A.F., Sangrador-Vegas, A.,  
868 Scheremetjew, M., Yong, S.Y., Lopez, R. and Hunter, S. (2014) InterProScan 5:  
869 genome-scale protein function classification. *Bioinformatics* **30**,1236-1240.
- 870 Kalyaanamoorthy, S., Minh, B.Q., Wong, T.K.F., von Haeseler, A. and Jermin, L.S.  
871 (2017) ModelFinder: fast model selection for accurate phylogenetic estimates.  
872 *Nat. Methods* **14**, 587-589.

- 873 Katoh, K. and Standley, D.M. (2013) MAFFT multiple sequence alignment software  
874 version 7: improvements in performance and usability. *Mol. Biol. Evol.*  
875 **30**,772-780.
- 876 Kielbasa, S.M., Wan, R., Sato, K., Horton, P. and Frith, M.C. (2011) Adaptive seeds  
877 tame genomic sequence comparison. *Genome Res.* **21**, 487-493.
- 878 Kim, D., Langmead, B. and Salzberg, S.L. (2015) HISAT: a fast spliced aligner with  
879 low memory requirements. *Nat. Methods* **12**,357-360.
- 880 Körner C. (2021) The cold range limit of trees. *Trends Ecol. Evol.* **13**,S0169-S5347.
- 881 Korf, I. (2004) Gene finding in novel genomes. *BMC Bioinformatics* **5**,59.
- 882 Krzywinski, M., Schein, J., Birol, I., Connors, J., Gascoyne, R., Horsman, D., Jones,  
883 S.J. and Marra, M.A. (2009) Circos: an information aesthetic for comparative  
884 genomics. *Genome Res.* **19**, 1639-1645.
- 885 Lau, W. and Sattely, E.S. (2015) Six enzymes from mayapple that complete the  
886 biosynthetic pathway to the etoposide aglycone. *Science* **11**,1224-1228.
- 887 Lê S, Josse J and Husson F (2008) FactoMineR: An R package for multivariate  
888 analyses. *J. Stat. Softw.* **25**,1-18.
- 889 Letizia, C.S., Cocchiara, J., Lalko, J. and Api, A.M. (2003) Fragrance material review  
890 on linalool. *Food Chem. Toxicol.* **41**,943-964.
- 891 Li, C., He, Q., Zhang, F., Yu, J., Li, C., Zhao, T., Zhang, Y., Xie, Q., Su, B., Mei, L.,  
892 Zhu, S, and Chen, J. (2019) Melatonin enhances cotton immunity to *Verticillium*  
893 wilt via manipulating lignin and gossypol biosynthesis. *Plant J.* **100**,784-800.
- 894 Li, L., Josef, B.A., Liu, B., Zheng, S., Huang, L. and Chen, S. (2017)  
895 Three-Dimensional Evaluation on Ecotypic Diversity of traditional Chinese  
896 medicine: A case study of *Artemisia annua* L. *Front. Plant Sci.* **8**.
- 897 Li, Q., Ramasamy, S., Singh, P., Hagel, J.M., Dunemann, S.M., Chen, X., Chen, R.,  
898 Yu, L., Tucker, J.E., Facchini, P.J. and Yeaman, S. (2020) Gene clustering and  
899 copy number variation in alkaloid metabolic pathways of opium poppy. *Nat.*  
900 *Commun.* **11**,1190.
- 901 Li, Y., Kong, D., Fu, Y., Sussman, M.R. and Wu, H. (2020) The effect of  
902 developmental and environmental factors on secondary metabolites in medicinal  
903 plants. *Plant Physiol. Biochem.* **148**,80-89.
- 904 Liu, L., Zuo, Z., Xu, F. and Wang, Y. (2020) Study on quality response to  
905 environmental factors and geographical traceability of wild gentiana rigescens  
906 Franch. *Front. Plant Sci.* **11**,1128.
- 907 Liu, X., Meng, Y., Zhang, Z., Wang, Y., Geng, X., Li, M., Li, Z. and Zhang, D. (2019)  
908 Functional nano-catalyzed pyrolyzates from branch of *Cinnamomum camphora*.  
909 *Saudi J. Biol. Sci.* **26**,1227-1246.
- 910 Love, M.I., Huber, W. and Anders, S. (2014) Moderated estimation of fold change and  
911 dispersion for RNA-seq data with DESeq2. *Genome Biol.* **15**, 550.
- 912 Luo, Q., Xu, C., Zheng, T., Ma, Y., Li, Y. and Zuo, Z. (2021) Leaf morphological and  
913 photosynthetic differences among four chemotypes of *Cinnamomum camphora*  
914 in different seasons. *Ind. Crop Prod.* **169**,113651.
- 915 Lv, Q., Qiu, J., Liu, J., Li, Z., Zhang, W., Wang, Q., Fang, J., Pan, J., Chen, Z., Cheng,  
916 W., Barker, M.S., Huang, X., Wei, X. and Cheng, K. (2020) The *Chimonanthus*

- 917 *salicifolius* genome provides insight into magnoliid evolution and flavonoid  
918 biosynthesis. *Plant J.* **103**,1910-1923.
- 919 Mandim, F., Petropoulos, S.A., Dias, M.I., Pinela, J., Kostic, M., Soković, M.,  
920 Santos-Buelga, C., Ferreira, I. and Barros, L. (2021) Seasonal variation in  
921 bioactive properties and phenolic composition of cardoon (*Cynara cardunculus*  
922 var. *altilis*) bracts. *Food Chem.* **336**,127744.
- 923 Massoni J, Couvreur TL and Sauquet H (2015) Five major shifts of diversification  
924 through the long evolutionary history of Magnoliidae (angiosperms). *BMC Evol.*  
925 *Biol.* **15**.
- 926 Moore, M.J., Bell, C.D., Soltis, P.S, and Soltis, D.E. (2007) Using plastid  
927 genome-scale data to resolve enigmatic relationships among basal angiosperms.  
928 *PNAS* **104**,19363-19368.
- 929 Nett, R.S., Lau, W. and Sattely, E.S. (2020) Discovery and engineering of colchicine  
930 alkaloid biosynthesis. *Nature* **584**,48-153.
- 931 Nguyen, L.T., Schmidt, H.A., von Haeseler, A. and Minh, B.Q. (2015) IQ-TREE: a fast  
932 and effective stochastic algorithm for estimating maximum-likelihood phylogenies.  
933 *Mol. Biol. Evol.* **32**, 268-274.
- 934 Ou, S. and Jiang, N. (2018) LTR\_retriever: A highly accurate and sensitive program  
935 for identification of long terminal repeat retrotransposons. *Plant Physiol.*  
936 **176**,1410-1422.
- 937 Ou, S., Su, W., Liao, Y., Chougule, K., Agda, J., Hellinga, A.J., Lugo, C., Elliott, T.A.,  
938 Ware, D., Peterson, T., Jiang, N., Hirsch, C.N. and Hufford, M.B. (2019)  
939 Benchmarking transposable element annotation methods for creation of a  
940 streamlined, comprehensive pipeline. *Genome Biol.* **20**,275.
- 941 Palmer, J.D., Soltis, D.E. and Chase, M.W. (2004) The plant tree of life: an overview  
942 and some points of view. *Am. J. Bot.* **91**,1437-1445.
- 943 Perteua, M., Kim, D., Perteua, G.M., Leek, J.T. and Salzberg, S.L. (2016)  
944 Transcript-level expression analyses of RNA-seq experiments with HISAT,  
945 StringTie and Ballgown. *Nat. Protoc.* **11**,1650-1667.
- 946 Qiao, X., Li, Q., Yin, H., Qi, K., Wang, R., Zhang S. and Paterson, A. (2019) Gene  
947 duplication and evolution in recurring polyploidization-diploidization cycles in  
948 plants. *Genome Biol.* **20**, 38.
- 949 Qin, L., Hu, Y., Wang, J., Wang, X., Zhao, R., Shan, H., Li, K., Xu, P., Wu, H., Yan, X.,  
950 Liu, L., Yi, X., Wanke, S., Bowers, J.E., Leebens-Mack, J.H., DePamphilis, C.W.,  
951 Soltis, P.S., Soltis, D.E., Kong, H. and Jiao, Y. (2021) Insights into angiosperm  
952 evolution, floral development and chemical biosynthesis from the *Aristolochia*  
953 *fimbriata* genome. *Nat. Plants* <https://doi.org/10.1038/s41477-021-00990-2>
- 954 Qiu, Y., Li, L., Wang, B., Xue, J., Hendry, T.A., Li, R., Brown, J.W., Liu, Y., Hudson,  
955 G.T. and Chen, Z. (2010) Angiosperm phylogeny inferred from sequences of four  
956 mitochondrial genes. *J. Syst. Evol.* **48**,391-425.
- 957 Ravindran, P.N., Nirmal Babu, K. and Shylaja, M. (2004) *Cinnamon and Cassia, the*  
958 *Genus Cinnamomum*. USA:CRC Press: Boca Raton.
- 959 Rendón-Anaya, M., Ibarra-Laclette, E., Mendez-Bravo, A., Lan, T., Zheng, C.,  
960 Carretero-Paulet, L., Perez-Torres, C.A., Chacon-Lopez, A., Hernandez-Guzman,



- 961 G., Chang, T.H., Farr, K.M., Barbazuk, W.B., Chamala, S., Mutwil, M., Shivhare,  
962 D., Alvarez-Ponce, D., Mitter, N., Hayward, A., Fletcher, S., Rozas, J., Sanchez,  
963 G.A., Kuhn, D., Barrientos-Priego, A.F., Salojarvi, J., Librado, P., Sankoff, D.,  
964 Herrera-Estrella, A., Albert, V.A. and Herrera-Estrella, L. (2019) The avocado  
965 genome informs deep angiosperm phylogeny, highlights introgressive  
966 hybridization, and reveals pathogen-influenced gene space adaptation. *PNAS*  
967 **116**,17081-17089.
- 968 Roach, M.J., Schmidt, S.A. and Borneman, A.R. (2018) Purge Haplotigs: allelic contig  
969 reassignment for third-gen diploid genome assemblies. *BMC Bioinformatics*  
970 **19**,460.
- 971 Seppey, M., Manni, M. and Zdobnov, E.M. (2019) BUSCO: Assessing Genome  
972 Assembly and Annotation Completeness. *Methods Mol. Biol.* **1962**,227-245.
- 973 Servant, N., Varoquaux, N., Lajoie, B.R., Viara, E., Chen, C.J., Vert, J.P., Heard, E.,  
974 Dekker, J. and Barillot, E. (2015) HiC-Pro: an optimized and flexible pipeline for  
975 Hi-C data processing. *Genome Biol.* **16**,259.
- 976 Shang, J., Tian, J., Cheng, H., Yan, Q., Li, L., Jamal, A., Xu, Z., Xiang, L., Saski, C.A.,  
977 Jin, S., Zhao, K., Liu, X. and Chen, L. (2020) The chromosome-level wintersweet  
978 (*Chimonanthus praecox*) genome provides insights into floral scent biosynthesis  
979 and flowering in winter. *Genome Biol.* **21**,200.
- 980 Sharma, S., Walia, S., Rathore, S., Kumar, P. and Kumar, R. (2020) Combined effect  
981 of elevated CO<sub>2</sub> and temperature on growth, biomass and secondary metabolite  
982 of *Hypericum perforatum* L. in a western Himalayan region. *J. Appl. Res. Med.*  
983 *Aroma.* **16**,2214-7861.
- 984 Shi, X., Dai, X., Liu, G., Zhang, J., Ning, G. and Bao, M. (2010). Cyclic secondary  
985 somatic embryogenesis and efficient plant regeneration in camphor tree  
986 (*Cinnamomum camphora* L.). *In Vitro Cell Dev. Pl.* **46**,117-125.
- 987 Stamatakis, A. (2014) RAxML version 8: a tool for phylogenetic analyses and  
988 post-analyses of large phylogenies. *Bioinformatics* **30**,1312-1313.
- 989 Stanke, M. and Morgenstern, B. (2005) AUGUSTUS: a web server for gene prediction  
990 in eukaryotes that allows user-defined constraints. *Nucleic Acids Res.*  
991 **33**,W465-W467.
- 992 Suyama, M., Torrents, D. and Bork, P. (2006) PAL2NAL: robust conversion of protein  
993 sequence alignments into the corresponding codon alignments. *Nucleic Acids*  
994 *Res.* **34**, W609-W612.
- 995 Tan, H., Hu, D., Song, J., Xu, Y., Cai, S., Chen, Q., Meng, Q., Li, S., Chen, S., Mao, Q.  
996 and Xu, H. (2015) Distinguishing *Radix Angelica sinensis* from different regions  
997 by HS-SFME/GC-MS. *Food Chem.* **186**,200-206.
- 998 Tang, H., Bowers, J.E., Wang, X., Ming, R., Alam, M. and Paterson, A.H. (2008)  
999 Synteny and collinearity in plant genomes. *Science* **320**, 486-488.
- 1000 Tholl, D. (2015) Biosynthesis and biological functions of terpenoids in plants. *Adv*  
1001 *Biochem. Eng. Biotechnol.* **148**,63-106.
- 1002 Tian, Z., Luo, Q. and Zuo, Z. (2021) Seasonal emission of monoterpenes from four  
1003 chemotypes of *Cinnamomum camphora*. *Ind. Crop Prod.* **163**,113327.
- 1004 Wang, D., Zhang, Y., Zhang, Z., Zhu, J. and Yu, J. (2010) KaKs\_Calculator 2.0: a

- 1005 toolkit incorporating gamma-series methods and sliding window strategies.  
1006 *Genomics Proteom. Bioinform.* **8**, 77-80.
- 1007 Wu, Y., Xiao, F., Xu, H., Zhang, T. and Jiang, X. (2014) Genome Survey in  
1008 *Cinnamomum camphora* L . Presl. *J. Plant. Genet. Resour.* **15**,149-152.
- 1009 Yang, Z. (2007) PAML 4, phylogenetic analyses by maximum likelihood. *Mol. Biol.*  
1010 *Evol.* **24**,1586-1591.
- 1011 Yoshida, T., Muraki, S., Kawamura, H. and Komatsu, A. (1969) Minor constituents of  
1012 Japanese ho-leaf oil the structures of (+)-tagetanol and (-)-trans-Hotrienol. *Agric.*  
1013 *Biol. Chem.* **3**,343-352.
- 1014 Yu, G., Wang, L.G., Han, Y., and He, Q.Y. (2012) clusterProfiler: an R package for  
1015 comparing biological themes among gene clusters. *OMICS* **16**, 284-287.
- 1016 Yuan, M., Yan, Z., Sun, D., Luo, X., Xie, L., Li, M., Wang, S., Shi, Q. and Zhang, Y.  
1017 (2020) New insights into the impact of ecological factor on bioactivities and  
1018 phytochemical composition of *Paeonia veitchii*. *Chem. Biodivers* **17**.
- 1019 Zeng, L., Zhang, Q., Sun, R., Kong, H., Zhang, N. and Ma, H. (2014) Resolution of  
1020 deep angiosperm phylogeny using conserved nuclear genes and estimates of  
1021 early divergence times. *Nat. Commun.* **5**,4956.
- 1022 Zhang, C., Rabiee, M., Sayyari, E. and Mirarab, S. (2018) ASTRAL-III: polynomial  
1023 time species tree reconstruction from partially resolved gene trees. *BMC*  
1024 *Bioinformatics* **19**,153.
- 1025 Zhang, Z., Wu, X., Lai, Y., Li, X., Zhang, D. and Chen, Y. (2020) Efficient extraction of  
1026 bioenergy from *Cinnamomum camphora* leaves. *Front. Energy Res.* **8**.
- 1027 Zhao, Z., Guo, P. and Brand, E. (2012) The formation of daodi medicinal materials. *J.*  
1028 *Ethnopharmacol.* **140**,476-481.
- 1029 Zhou, F. and Pichersky, E. (2020) More is better: the diversity of terpene metabolism  
1030 in plants. *Curr. Opin. Plant Biol.* **55**,1-10.  
1031  
1032
